# Supplementary material
Source: PubMed Central journal article supplement (PMC6754594)
Supplement: pnas.1912719116.sapp.pdf [file pnas.1912719116.sapp.pdf]

# Rational construction of a library of $M_{29}$ nanoclusters from monometallic to tetrametallic

Xi Kang<sup>a</sup>, Xiao Wei<sup>a</sup>, Shan Jin<sup>a</sup>, Qianqin Yuan<sup>a</sup>, Xinqi Luan<sup>b</sup>, Yong Pei<sup>b</sup>, Shuxin Wang<sup>a,\*</sup>, Manzhou Zhu<sup>a,\*</sup> and Rongchao Jin<sup>c,\*</sup>

## Affiliations

<sup>a</sup> Department of Chemistry and Centre for Atomic Engineering of Advanced Materials, Anhui Province Key Laboratory of Chemistry for Inorganic/Organic Hybrid Functionalized Materials, Anhui University, Hefei, Anhui 230601, China.

<sup>b</sup> Department of Chemistry, Key Laboratory of Environmentally Friendly Chemistry and Applications of Ministry of Education, Xiangtan University, Xiangtan, Hunan 411105, China.

<sup>c</sup> Department of Chemistry, Carnegie Mellon University, Pittsburgh, PA 15213, USA.

## E-mail

Shuxin Wang

Email: [ixing@ahu.edu.cn](mailto:ixing@ahu.edu.cn)

Manzhou Zhu

Email: [zmz@ahu.edu.cn](mailto:zmz@ahu.edu.cn)

Rongchao Jin

Email: [rongchao@andrew.cmu.edu](mailto:rongchao@andrew.cmu.edu)

## This PDF file includes:

Materials and Methods

Figs. S1 to S53

Tables S1 to S4

## Methods

**Materials.** All chemicals including silver nitrate ( $\text{AgNO}_3$ , 99.9%, metal basis), tetrachloroauric (III) acid ( $\text{HAuCl}_4 \cdot 4\text{H}_2\text{O}$ , 99.9%, metal basis), cuprous chloride ( $\text{CuCl}$ , 99.9%, metal basis), palladium acetate ( $\text{Pd}(\text{OAc})_2$ , 99.9% metals basis), hexachloroplatinic (IV) acid ( $\text{H}_2\text{PtCl}_6 \cdot 6\text{H}_2\text{O}$ , 99.9% metals basis), triphenylphosphine ( $\text{PPh}_3$ , 99%), 1-adamantanethiol ( $\text{Adm-SH}$ ,  $\text{C}_{10}\text{H}_{15}\text{SH}$ , 99%), methyl sulfide ( $\text{S}(\text{CH}_3)_2$ , 99%), sodium borohydride ( $\text{NaBH}_4$ , 99.9%), hydrogen peroxide solution ( $\text{H}_2\text{O}_2$ , 30 wt. % in  $\text{H}_2\text{O}$ , GR grade), methylene chloride ( $\text{CH}_2\text{Cl}_2$ , HPLC grade), methanol ( $\text{CH}_3\text{OH}$ , HPLC), ethanol ( $\text{CH}_3\text{CH}_2\text{OH}$ , HPLC), acetic ether ( $\text{CH}_3\text{COOC}_2\text{H}_5$ , HPLC), acetonitrile ( $\text{CH}_3\text{CN}$ , HPLC grade) are purchased from Sigma-Aldrich and used without further purification. Pure water is purchased from Wahaha Co. Ltd. All glassware are thoroughly cleaned with aqua regia ( $\text{HCl}:\text{HNO}_3 = 3:1$  vol.), rinsed with copious pure water, and then dried in an oven prior to use.

**Synthesis of  $\text{Au}^{\text{I}}(\text{PPh}_3)\text{Cl}$  complex.**  $\text{HAuCl}_4 \cdot 4\text{H}_2\text{O}$  (0.42 g, 1 mmol) was dissolved in  $\text{CH}_3\text{OH}$  (20 mL).  $(\text{CH}_3)_2\text{S}$  (380  $\mu\text{L}$ , 5 mmol) was added under vigorous stirring ( $\sim 1200$  rpm) and the stirring was continued for 30 min. The precipitate was then collected and further dissolved in 30 mL  $\text{CH}_2\text{Cl}_2$ . After that,  $\text{PPh}_3$  (0.29 g, 1.1 mmol) was dissolved in  $\text{CH}_2\text{Cl}_2$  (10 mL) and added to the first solution in a dropwise manner under vigorous stirring ( $\sim 1200$  rpm) and the stirring was continued for 15 min. The resulting mixture was then filtered. The filtrate was slowly rotavaporated under vacuum. The final product ( $\text{Au}^{\text{I}}(\text{PPh}_3)\text{Cl}$ ) was directly used in the next step.

**Synthesis of  $\text{Ag}^{\text{I}}(\text{PPh}_3)\text{NO}_3$  or  $\text{Cu}^{\text{I}}(\text{PPh}_3)_2\text{Cl}$  complex.**  $\text{AgNO}_3$  (0.17 g, 1 mmol) or  $\text{CuCl}$  (0.1 g, 1 mmol) was dissolved in  $\text{CH}_3\text{CN}$  (5 mL).  $\text{PPh}_3$  (0.29 g, 1.1 mmol for the  $\text{Ag}^{\text{I}}$  complex and 0.58 g, 2.2 mmol for the  $\text{Cu}^{\text{I}}$  complex) was dissolved in  $\text{CH}_3\text{CN}$  (10 mL) and added to the first solution in a dropwise manner under vigorous stirring ( $\sim 1200$  rpm) and the stirring was continued for 15 min. The resulting mixture was then filtered. The filtrate was slowly rotavaporated under vacuum. The final product ( $\text{Ag}^{\text{I}}(\text{PPh}_3)\text{NO}_3$  or  $\text{Cu}^{\text{I}}(\text{PPh}_3)_2\text{Cl}$ ) was directly used in the next step.

**Synthesis of mono-metallic  $[\text{Ag}_{29}(\text{S-Adm})_{18}(\text{PPh}_3)_4]^{3+}$  nanocluster.** For the nanocluster synthesis,  $\text{AgNO}_3$  (30 mg, 0.18 mmol) was dissolved in  $\text{CH}_3\text{OH}$  (5 mL) and  $\text{CH}_3\text{COOC}_2\text{H}_5$  (35 mL) with sonication. The solution was vigorously stirred ( $\sim 1200$  rpm) with magnetic stirring for 15 min. Then,  $\text{Adm-SH}$  (0.1 g) and  $\text{PPh}_3$  (0.1 g) were added and the reaction was vigorously stirred ( $\sim 1200$  rpm) for another 90 min. After that,  $\text{NaBH}_4$  (1 mL) aqueous solution (20 mg  $\text{mL}^{-1}$ ) was added quickly to the above mixture. The reaction was allowed to proceed for 36 h under a  $\text{N}_2$  atmosphere. After that, the aqueous layer was removed, and the mixture in the organic phase was rotavaporated under vacuum. Then approximately 15\*3 mL of  $\text{CH}_3\text{OH}$  was used to wash the synthesized nanoclusters. The precipitate was dissolved in  $\text{CH}_2\text{Cl}_2$ , which produced the  $[\text{Ag}_{29}(\text{S-Adm})_{18}(\text{PPh}_3)_4]^{3+}$  nanocluster. The yield is 16% based on the Ag element (calculated from the  $\text{AgNO}_3$ ) for synthesizing the  $[\text{Ag}_{29}(\text{S-Adm})_{18}(\text{PPh}_3)_4]^{3+}$  nanocluster.

**Synthesis of bi-metallic  $[\text{Au}_1\text{Ag}_{28}(\text{S-Adm})_{18}(\text{PPh}_3)_4]^{3+}$  nanocluster.** Specifically, the metal source for synthesizing  $[\text{Ag}_{29}(\text{S-Adm})_{18}(\text{PPh}_3)_4]^{3+}$  nanocluster (*i.e.*,  $\text{AgNO}_3$ , 0.18 mmol) was altered to Ag/Au mixture ( $\text{AgNO}_3/\text{Au}^{\text{I}}(\text{PPh}_3)\text{Cl} = 0.172/0.008$  mmol in the  $[\text{Au}_1\text{Ag}_{28}(\text{S-Adm})_{18}(\text{PPh}_3)_4]^{3+}$  synthesis) and the other conditions were not changed, then the  $[\text{Au}_1\text{Ag}_{28}(\text{S-Adm})_{18}(\text{PPh}_3)_4]^{3+}$

nanocluster was obtained. The yield is 25% based on the Ag element (calculated from the AgNO<sub>3</sub>) for synthesizing the [Au<sub>1</sub>Ag<sub>28</sub>(S-Adm)<sub>18</sub>(PPh<sub>3</sub>)<sub>4</sub>]<sup>3+</sup> nanocluster. It should be noted that the small amount of Au<sup>I</sup>(PPh<sub>3</sub>)Cl in the Ag/Au mixture (~ 20/1) is important for synthesizing the [Au<sub>1</sub>Ag<sub>28</sub>(S-Adm)<sub>18</sub>(PPh<sub>3</sub>)<sub>4</sub>]<sup>3+</sup> nanocluster in mono-dispersity.

**Synthesis of bi-metallic [M<sub>1</sub>Ag<sub>28</sub>(S-Adm)<sub>18</sub>(PPh<sub>3</sub>)<sub>4</sub>]<sup>2+</sup> (M=Pt/Pd) nanoclusters.** Specifically, the metal source for synthesizing [Ag<sub>29</sub>(S-Adm)<sub>18</sub>(PPh<sub>3</sub>)<sub>4</sub>]<sup>3+</sup> nanocluster (*i.e.*, AgNO<sub>3</sub>, 0.18 mmol) was altered to Ag/Pt or Ag/Pd mixture (AgNO<sub>3</sub>/H<sub>2</sub>PtCl<sub>6</sub>·6H<sub>2</sub>O = 0.17/0.01 mmol in the [Pt<sub>1</sub>Ag<sub>28</sub>(S-Adm)<sub>18</sub>(PPh<sub>3</sub>)<sub>4</sub>]<sup>2+</sup> synthesis or AgNO<sub>3</sub>/Pd(OAc)<sub>2</sub> = 0.17/0.01 mmol in the [Pd<sub>1</sub>Ag<sub>28</sub>(S-Adm)<sub>18</sub>(PPh<sub>3</sub>)<sub>4</sub>]<sup>2+</sup> synthesis) and the other conditions were not changed, then the [M<sub>1</sub>Ag<sub>28</sub>(S-Adm)<sub>18</sub>(PPh<sub>3</sub>)<sub>4</sub>]<sup>2+</sup> (M = Pt/Pd) nanoclusters were obtained. The yields are 45% and 16% based on the Ag element (calculated from the AgNO<sub>3</sub>) for synthesizing the [Pt<sub>1</sub>Ag<sub>28</sub>(S-Adm)<sub>18</sub>(PPh<sub>3</sub>)<sub>4</sub>]<sup>2+</sup> and [Pd<sub>1</sub>Ag<sub>28</sub>(S-Adm)<sub>18</sub>(PPh<sub>3</sub>)<sub>4</sub>]<sup>2+</sup> nanoclusters, respectively.

**Synthesis of tri-metallic [Pt<sub>1</sub>Ag<sub>12+x</sub>Cu<sub>16-x</sub>(S-Adm)<sub>18</sub>(PPh<sub>3</sub>)<sub>4</sub>]<sup>2+</sup> (x = 0-4) nanoclusters.** Specifically, the metal source for synthesizing [Ag<sub>29</sub>(S-Adm)<sub>18</sub>(PPh<sub>3</sub>)<sub>4</sub>]<sup>3+</sup> nanocluster (*i.e.*, AgNO<sub>3</sub>, 0.18 mmol) was altered to Ag/Cu/Pt mixture (AgNO<sub>3</sub>/Cu<sup>I</sup>(PPh<sub>3</sub>)<sub>2</sub>Cl/H<sub>2</sub>PtCl<sub>6</sub>·6H<sub>2</sub>O = 0.1/0.07/0.01 mmol in the [Pt<sub>1</sub>Ag<sub>12+x</sub>Cu<sub>16-x</sub>(S-Adm)<sub>18</sub>(PPh<sub>3</sub>)<sub>4</sub>]<sup>2+</sup> synthesis) and the other conditions were not changed, then the [Pt<sub>1</sub>Ag<sub>12+x</sub>Cu<sub>16-x</sub>(S-Adm)<sub>18</sub>(PPh<sub>3</sub>)<sub>4</sub>]<sup>2+</sup> nanoclusters were obtained. The yield is 15% based on the Ag element (calculated from the AgNO<sub>3</sub>) for synthesizing the [Pt<sub>1</sub>Ag<sub>12+x</sub>Cu<sub>16-x</sub>(S-Adm)<sub>18</sub>(PPh<sub>3</sub>)<sub>4</sub>]<sup>2+</sup> nanoclusters.

**Synthesis of tri-metallic [Pt<sub>1</sub>Ag<sub>12</sub>Cu<sub>16</sub>(S-Adm)<sub>18</sub>(PPh<sub>3</sub>)<sub>4</sub>]<sup>2+</sup> and [Pt<sub>1</sub>Ag<sub>16</sub>Cu<sub>12</sub>(S-Adm)<sub>18</sub>(PPh<sub>3</sub>)<sub>4</sub>]<sup>2+</sup> nanoclusters.** A target metal-exchange method was exploited to “focus” the poly-dispersed [Pt<sub>1</sub>Ag<sub>12+x</sub>Cu<sub>16-x</sub>(S-Adm)<sub>18</sub>(PPh<sub>3</sub>)<sub>4</sub>]<sup>2+</sup> (x = 0-4) nanoclusters into the [Pt<sub>1</sub>Ag<sub>12</sub>Cu<sub>16</sub>(S-Adm)<sub>18</sub>(PPh<sub>3</sub>)<sub>4</sub>]<sup>2+</sup> or [Pt<sub>1</sub>Ag<sub>16</sub>Cu<sub>12</sub>(S-Adm)<sub>18</sub>(PPh<sub>3</sub>)<sub>4</sub>]<sup>2+</sup>. Specifically, 0.1 mmol [Pt<sub>1</sub>Ag<sub>12+x</sub>Cu<sub>16-x</sub>(S-Adm)<sub>18</sub>(PPh<sub>3</sub>)<sub>4</sub>]<sup>2+</sup> was dissolved in 20 mL CH<sub>2</sub>Cl<sub>2</sub>. 1 mmol Cu<sup>I</sup>(PPh<sub>3</sub>)<sub>2</sub>Cl was added to the above solution and the solution was further vigorously stirred (~1200 rpm) for 30 min. The organic phase was rotavaporated under vacuum and washed several times with CH<sub>3</sub>OH. The precipitate was dissolved in CH<sub>2</sub>Cl<sub>2</sub>, which produced pure [Pt<sub>1</sub>Ag<sub>12</sub>Cu<sub>16</sub>(S-Adm)<sub>18</sub>(PPh<sub>3</sub>)<sub>4</sub>]<sup>2+</sup>. The yield is 80% based on the [Pt<sub>1</sub>Ag<sub>12+x</sub>Cu<sub>16-x</sub>(S-Adm)<sub>18</sub>(PPh<sub>3</sub>)<sub>4</sub>]<sup>2+</sup> nanoclusters for synthesizing the [Pt<sub>1</sub>Ag<sub>12</sub>Cu<sub>16</sub>(S-Adm)<sub>18</sub>(PPh<sub>3</sub>)<sub>4</sub>]<sup>2+</sup> nanocluster. Changing the Cu<sup>I</sup>(PPh<sub>3</sub>)Cl into the Ag<sup>I</sup>(PPh<sub>3</sub>)NO<sub>3</sub> generated pure [Pt<sub>1</sub>Ag<sub>16</sub>Cu<sub>12</sub>(S-Adm)<sub>18</sub>(PPh<sub>3</sub>)<sub>4</sub>]<sup>2+</sup> with 70% yield.

**Synthesis of tri-metallic [Pd<sub>1</sub>Ag<sub>12+x</sub>Cu<sub>16-x</sub>(S-Adm)<sub>18</sub>(PPh<sub>3</sub>)<sub>4</sub>]<sup>2+</sup> (x = 0-4), [Pd<sub>1</sub>Ag<sub>12</sub>Cu<sub>16</sub>(S-Adm)<sub>18</sub>(PPh<sub>3</sub>)<sub>4</sub>]<sup>2+</sup>, and [Pd<sub>1</sub>Ag<sub>16</sub>Cu<sub>12</sub>(S-Adm)<sub>18</sub>(PPh<sub>3</sub>)<sub>4</sub>]<sup>2+</sup> nanoclusters.** The synthesis of Pd-centered tri-metallic nanoclusters are the same as the synthetic procedures of the Pt-centered tri-metallic nanoclusters, just by altering the H<sub>2</sub>PtCl<sub>6</sub>·6H<sub>2</sub>O source to Pd(OAc)<sub>2</sub>.

**Synthesis of tri-metallic [Au<sub>1</sub>Ag<sub>12+x</sub>Cu<sub>16-x</sub>(S-Adm)<sub>18</sub>(PPh<sub>3</sub>)<sub>4</sub>]<sup>3+</sup> (x = 0-4) nanoclusters.** Specifically, the metal source for synthesizing [Ag<sub>29</sub>(S-Adm)<sub>18</sub>(PPh<sub>3</sub>)<sub>4</sub>]<sup>3+</sup> nanocluster (*i.e.*, AgNO<sub>3</sub>, 0.18 mmol) was altered to Ag/Cu/Au mixture (AgNO<sub>3</sub>/Cu<sup>I</sup>(PPh<sub>3</sub>)<sub>2</sub>Cl/Au<sup>I</sup>(PPh<sub>3</sub>)Cl = 0.1/0.075/0.005 mmol in the [Au<sub>1</sub>Ag<sub>12+x</sub>Cu<sub>16-x</sub>(S-Adm)<sub>18</sub>(PPh<sub>3</sub>)<sub>4</sub>]<sup>3+</sup> synthesis) and the other conditions were not changed, then the [Au<sub>1</sub>Ag<sub>12+x</sub>Cu<sub>16-x</sub>(S-Adm)<sub>18</sub>(PPh<sub>3</sub>)<sub>4</sub>]<sup>3+</sup> nanoclusters were obtained. The yield is 25% based on

the Ag element (calculated from the  $\text{AgNO}_3$ ) for synthesizing the  $[\text{Au}_1\text{Ag}_{12+x}\text{Cu}_{16-x}(\text{S-Adm})_{18}(\text{PPh}_3)_4]^{3+}$  nanoclusters. It should be noted that the small amount of  $\text{Au}^1(\text{PPh}_3)\text{Cl}$  in the Ag/Cu/Au (~10/10/1) mixture is important for synthesizing the  $[\text{Au}_1\text{Ag}_{12+x}\text{Cu}_{16-x}(\text{S-Adm})_{18}(\text{PPh}_3)_4]^{3+}$  nanocluster in mono-dispersity.

**Synthesis of tri-metallic  $[\text{Au}_1\text{Ag}_{12+x}\text{Cu}_{16-x}(\text{S-Adm})_{18}(\text{PPh}_3)_4]^{3+}$  ( $x = 0-4$ ),  $[\text{Au}_1\text{Ag}_{12}\text{Cu}_{16}(\text{S-Adm})_{18}(\text{PPh}_3)_4]^{3+}$ , and  $[\text{Au}_1\text{Ag}_{16}\text{Cu}_{12}(\text{S-Adm})_{18}(\text{PPh}_3)_4]^{3+}$  nanoclusters.** The syntheses of Au-centered tri-metallic nanoclusters were the same as the synthetic procedures in the synthesis of Pt-centered tri-metallic nanoclusters, just by altering the  $[\text{Pt}_1\text{Ag}_{12+x}\text{Cu}_{16-x}(\text{S-Adm})_{18}(\text{PPh}_3)_4]^{2+}$  precursor to the  $[\text{Au}_1\text{Ag}_{12+x}\text{Cu}_{16-x}(\text{S-Adm})_{18}(\text{PPh}_3)_4]^{3+}$  precursor.

**Synthesis of tetra-metallic  $[\text{Pt}_1\text{Ag}_{12}\text{Cu}_{16-x}\text{Au}_x(\text{S-Adm})_{18}(\text{PPh}_3)_4]^{2+}$  ( $x = 0-4$ ) nanoclusters.** A target metal-exchange method was exploited to alloy the tri-metallic  $[\text{Pt}_1\text{Ag}_{12}\text{Cu}_{16}(\text{S-Adm})_{18}(\text{PPh}_3)_4]^{2+}$  nanocluster into the tetra-metallic  $[\text{Pt}_1\text{Ag}_{12}\text{Cu}_{16-x}\text{Au}_x(\text{S-Adm})_{18}(\text{PPh}_3)_4]^{2+}$  ( $x = 0-4$ ) nanoclusters. Specifically, 0.1 mmol  $[\text{Pt}_1\text{Ag}_{12}\text{Cu}_{16}(\text{S-Adm})_{18}(\text{PPh}_3)_4]^{2+}$  was dissolved in 20 mL  $\text{CH}_2\text{Cl}_2$ . 0.5 mmol  $\text{Au}^1(\text{PPh}_3)\text{Cl}$  was added to the above solution and the solution was further vigorously stirred (~1200 rpm) for 60 min. The organic phase was rotavaporated under vacuum. The precipitate was dissolved in  $\text{CH}_2\text{Cl}_2$ , which produced the tetra-metallic  $[\text{Pt}_1\text{Ag}_{12}\text{Cu}_{16-x}\text{Au}_x(\text{S-Adm})_{18}(\text{PPh}_3)_4]^{2+}$  nanocluster. The yield is 85% based on the  $[\text{Pt}_1\text{Ag}_{12}\text{Cu}_{16}(\text{S-Adm})_{18}(\text{PPh}_3)_4]^{2+}$  for synthesizing the  $[\text{Pt}_1\text{Ag}_{12}\text{Cu}_{16-x}\text{Au}_x(\text{S-Adm})_{18}(\text{PPh}_3)_4]^{2+}$  nanocluster.

**Synthesis of tetra-metallic  $[\text{Pt}_1\text{Ag}_{12}\text{Cu}_{12}\text{Au}_4(\text{S-Adm})_{18}(\text{PPh}_3)_4]^{2+}$  nanocluster.** The forced metal-exchange method was exploited to alloy the poly-dispersed  $[\text{Pt}_1\text{Ag}_{12}\text{Cu}_{16-x}\text{Au}_x(\text{S-Adm})_{18}(\text{PPh}_3)_4]^{2+}$  ( $x = 0-4$ ) nanoclusters into the mono-dispersed  $[\text{Pt}_1\text{Ag}_{12}\text{Cu}_{12}\text{Au}_4(\text{S-Adm})_{18}(\text{PPh}_3)_4]^{2+}$  nanocluster. Specifically, 0.1 mmol  $[\text{Pt}_1\text{Ag}_{12}\text{Cu}_{16-x}\text{Au}_x(\text{S-Adm})_{18}(\text{PPh}_3)_4]^{2+}$  was dissolved in 20 mL  $\text{CH}_2\text{Cl}_2$ . 200  $\mu\text{L}$   $\text{H}_2\text{O}_2$  was added and the solution was further vigorously stirred (~1200 rpm) for 3 min. Then 0.5 mmol  $\text{Au}^1(\text{PPh}_3)\text{Cl}$  was added to the above solution and further vigorously stirred for 30 min. The  $\text{H}_2\text{O}_2@\text{Au}^1(\text{PPh}_3)\text{Cl}$  addition was repeated 3 times to eliminate the  $\text{Cu}^1$  coordination completely. The organic phase was then precipitated with a large amount of  $\text{CH}_3\text{OH}$ . Finally, the precipitate was dissolved in  $\text{CH}_2\text{Cl}_2$ , which produced the mono-dispersed  $[\text{Pt}_1\text{Ag}_{12}\text{Cu}_{12}\text{Au}_4(\text{S-Adm})_{18}(\text{PPh}_3)_4]^{2+}$  nanocluster. The yield is 20% based on the  $[\text{Pt}_1\text{Ag}_{12}\text{Cu}_{16-x}\text{Au}_x(\text{S-Adm})_{18}(\text{PPh}_3)_4]^{2+}$  for synthesizing the  $[\text{Pt}_1\text{Ag}_{12}\text{Cu}_{12}\text{Au}_4(\text{S-Adm})_{18}(\text{PPh}_3)_4]^{2+}$  nanocluster.

**Synthesis of tetra-metallic  $[\text{Pd}_1\text{Ag}_{12}\text{Cu}_{16-x}\text{Au}_x(\text{S-Adm})_{18}(\text{PPh}_3)_4]^{2+}$  ( $x = 0-4$ ) and  $[\text{Pd}_1\text{Ag}_{12}\text{Cu}_{12}\text{Au}_4(\text{S-Adm})_{18}(\text{PPh}_3)_4]^{2+}$  nanoclusters.** The syntheses of Pd-centered tetra-metallic nanoclusters are the same as the synthetic procedures in the synthesis of the Pt-centered tetra-metallic nanoclusters, just by altering the  $[\text{Pt}_1\text{Ag}_{12}\text{Cu}_{16}(\text{S-Adm})_{18}(\text{PPh}_3)_4]^{2+}$  precursor to the  $[\text{Pd}_1\text{Ag}_{12}\text{Cu}_{16}(\text{S-Adm})_{18}(\text{PPh}_3)_4]^{2+}$ .

Following the aforementioned target metal-exchange and forced metal-exchange methods to control the four vertex metal atoms, other 9 alloy nanoclusters with mono-dispersity were obtained, including  $\text{Ag}_{25}\text{Au}_4$ ,  $\text{Ag}_{25}\text{Cu}_4$ ,  $\text{Ag}_{24}\text{Au}_5$ ,  $\text{Au}_1\text{Ag}_{24}\text{Cu}_4$ ,  $\text{Au}_5\text{Ag}_{12}\text{Cu}_{12}$ ,  $\text{Pt}_1\text{Au}_4\text{Ag}_{24}$ ,  $\text{Pt}_1\text{Cu}_4\text{Ag}_{24}$ ,  $\text{Pd}_1\text{Au}_4\text{Ag}_{24}$  and  $\text{Pd}_1\text{Cu}_4\text{Ag}_{24}$  nanoclusters.

**Crystallization of  $\text{Au}_1\text{Ag}_{28}(\text{S-Adm})_{18}(\text{PPh}_3)_4$  and  $\text{Pt}_1\text{Ag}_{12}\text{Cu}_{16}(\text{S-Adm})_{18}(\text{PPh}_3)_4$  nanoclusters.** Single crystals of  $\text{Au}_1\text{Ag}_{28}(\text{S-Adm})_{18}(\text{PPh}_3)_4$  and  $\text{Pt}_1\text{Ag}_{12}\text{Cu}_{16}(\text{S-Adm})_{18}(\text{PPh}_3)_4$  nanoclusters were grown at room temperature for 7 days in  $\text{CH}_2\text{Cl}_2/\text{CH}_3\text{OH}$ . This step was repeated for 3 times to obtain high quality single crystals. Then, red crystals were collected and the structures of  $\text{Au}_1\text{Ag}_{28}(\text{S-Adm})_{18}(\text{PPh}_3)_4$  and  $\text{Pt}_1\text{Ag}_{12}\text{Cu}_{16}(\text{S-Adm})_{18}(\text{PPh}_3)_4$  nanoclusters were determined by X-ray crystallography.

**Characterizations.** All UV-vis absorption spectra of nanoclusters dissolved in  $\text{CH}_2\text{Cl}_2$  were recorded using an Agilent 8453 diode array spectrometer, whose background correction was made using a  $\text{CH}_2\text{Cl}_2$  blank. Nanocluster samples were dissolved in  $\text{CH}_2\text{Cl}_2$  to make dilute solutions, followed by spectral measurement (1 cm path length quartz cuvette).

Electrospray ionization time-of-flight mass spectrometry (ESI-TOF-MS) measurement was performed by MicrOTOF-QIII high-resolution mass spectrometer. The sample was directly infused into the chamber at 5  $\mu\text{L}/\text{min}$ . To prepare the ESI sample, nanoclusters were dissolved in  $\text{CH}_2\text{Cl}_2$  (1 mg/mL) and diluted ( $v/v=1:2$ ) by  $\text{CH}_3\text{OH}$ . Mass spectra of nanoclusters are measured in the positive mode.

PL spectra were measured on an FL-4500 spectrofluorometer with the same optical density (OD) of  $\sim 0.05$ . In these experiments, the nanocluster solutions were prepared in  $\text{CH}_2\text{Cl}_2$  at a concentration of less than 1 mg mL<sup>-1</sup>.

Quantum yields (QYs) were measured with dilute solutions of nanoclusters on a HORIBA FluoroMax-4P.

X-ray photoelectron spectroscopy (XPS) measurement was performed on a Thermo ESCALAB 250, configured with a monochromated AlK $\alpha$  (1486.8 eV) 150W X-ray source, 0.5 mm circular spot size, a flood gun to counter charging effects, and the analysis chamber base pressure lower than  $1 \times 10^{-9}$  mbar, data were collected with FAT=20 eV.

Element analysis (EA) was performed on Vario EL cube. 3 mg of each sample was used in the experiment.

Inductively coupled plasma-atomic emission spectrometry (ICP-AES) measurement was performed on an Atomscan Advantage instrument made by Thermo Jarrell Ash Corporation (USA). The nanoclusters were digested by concentrated nitric acid and the concentration of the nanoclusters were set to 0.5 mg L<sup>-1</sup> approximately.

<sup>31</sup>P nuclear magnetic resonance (NMR) spectra were acquired using a Bruker 600 AVANAC III spectrometer equipped with a Bruker BBO multinuclear probe (BrukerBioSpin, Rheinstetten, Germany). To achieve a sufficient signal-to-noise ratio, the <sup>31</sup>P NMR spectra were recorded by collecting 1k scans with a recycle delay time of 5s.

**X-Ray Crystallography.** The data collection for single crystal X-ray diffraction was carried out on a Bruker Smart APEX II CCD diffractometer under liquid nitrogen flow, using graphite-monochromatized Mo K $\alpha$  radiation ( $\lambda = 0.71073 \text{ \AA}$ ). Data reductions and absorption corrections were performed using the SAINT and SADABS programs, respectively.<sup>[S1]</sup> The electron density was squeezed by platon, and solvent has also been squeezed by platon. Detailed information can be found in the Supplementary Tables S3 and S4. The structure was solved by direct methods and refined with full-matrix least squares on  $F^2$  using the SHELXTL software

package.<sup>[S2]</sup> All non-hydrogen atoms were refined anisotropically, and all the hydrogen atoms were set in geometrically calculated positions and refined isotropically using a riding model.

**Theoretical Methods.** The structural optimizations are carried out using the DMol<sup>3</sup> package.<sup>[S3,S4]</sup> In these calculations, the generalized gradient approximation (GGA) with the Perdew-Burke-Ernzerhof (PBE) functional.<sup>[S5]</sup> Moreover, considering the computational accuracy and efficiency, the DND4.4 basis chosen in the structural optimization. The Tkatchenko-Scheffler (TS) method is used for the DFT-D calculations.<sup>[S6]</sup> The convergence criterion of the geometrical optimization was set to be  $1.0 \times 10^{-5}$  Hartree for energy change,  $4.0 \times 10^{-3}$  Hartree/Å for the gradient, and  $5.0 \times 10^{-3}$  Å for the atom displacement, respectively.

Reference:

[S1] G. M. Sheldrick. SADABS; University of Gottingen: Gottingen, Germany, **1996**.

[S2] D. M. Sheldrick. Crystal structure refinement with SHELXL. *Acta Crystallogr., Sect. C: Struct. Chem.* **2015**, *71*, 3-8.

[S3] B. Delley. From Molecules to Solids with the DMol3 Approach. *J. Chem. Phys.* **2000**, *113*, 7756-7764.

[S4] B. Delley. An All-Electron Numerical Method for Solving the Local Density Functional for Polyatomic Molecules. *J. Chem. Phys.* **1990**, *92*, 508-517.

[S5] J. P. Perdew, K. Burke, M. Ernzerhof. Generalized Gradient Approximation Made Simple. *Phys. Rev. Lett.* **1996**, *77*, 3865-3868.

[S6] J. P. Perdew, V. N. Staroverov, G. E. Scuseria, J. Tao. Climbing the Density Functional Ladder: Nonempirical Meta-Generalized Gradient Approximation Designed for Molecules and Solids. *Phys. Rev. Lett.* **2003**, *91*, 146401.

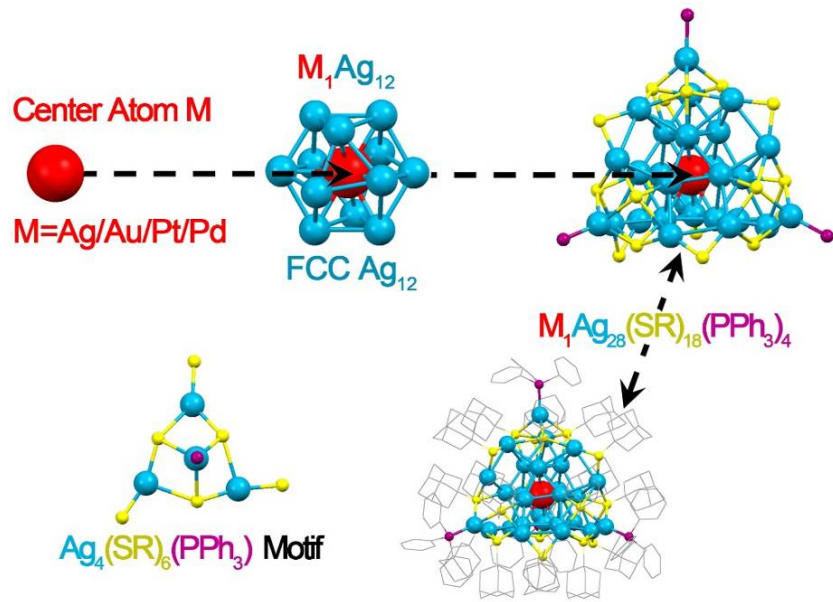

**Fig. S1** Structural anatomy of the  $M_1\text{Ag}_{28}(\text{SR})_{18}(\text{PPh}_3)_4$  nanoclusters (where,  $M = \text{Ag/Au/Pt/Pd}$ ,  $\text{SR} = \text{S-Adm}$ ). Color codes: red sphere, the center atom  $M$ ; cerulean sphere,  $\text{Ag}$ ; yellow sphere,  $\text{S}$ ; purple sphere,  $\text{P}$ ; grey sphere,  $\text{C}$ . For clarity, the hydrogen atoms are not shown.

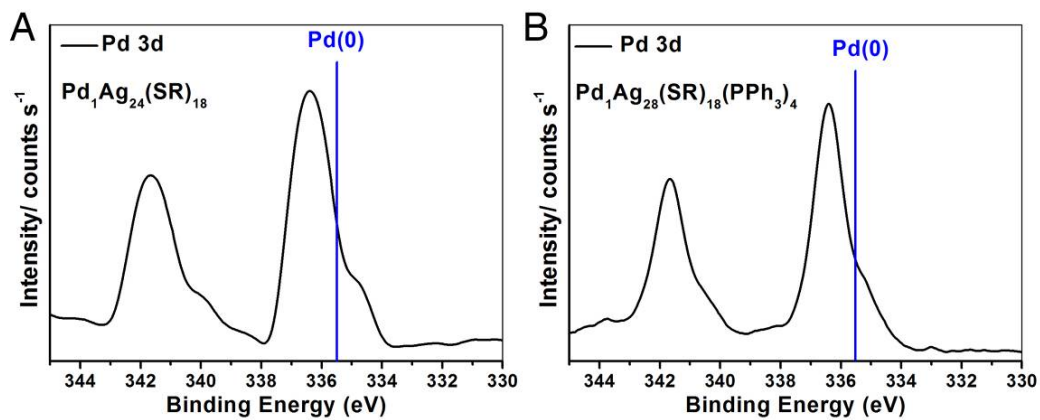

**Fig. S2** X-ray photoelectron spectroscopy (XPS) of the Pd 3d in (A)  $\text{Pd}_1\text{Ag}_{24}(\text{SR})_{18}$  or (B)  $\text{Pd}_1\text{Ag}_{28}(\text{SR})_{18}(\text{PPh}_3)_4$  nanoclusters.

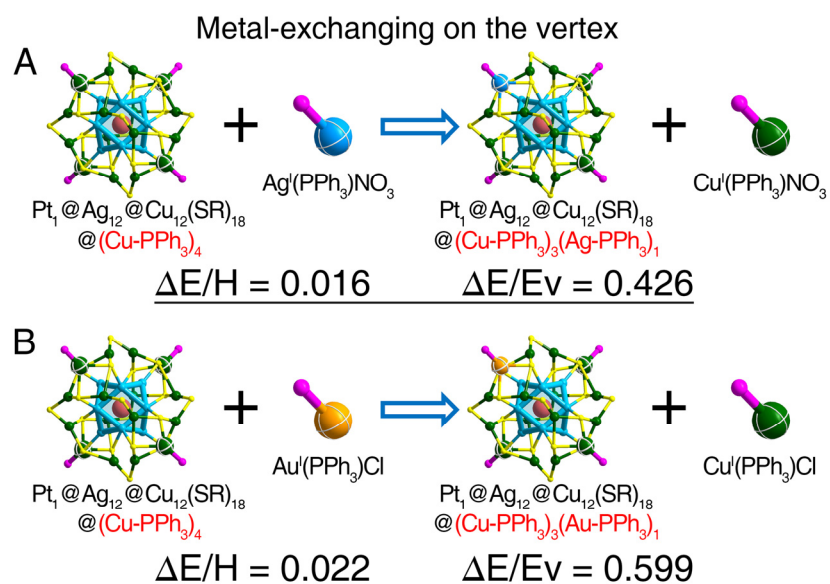

**Fig. S3** Required energy by substituting a vertex Cu atom in  $\text{Pt}_1 @ \text{Ag}_{12} @ \text{Cu}_{12}(\text{SR})_{18} @ (\text{Cu-PPh}_3)_4$  with (A) an Ag heteroatom from  $\text{Ag}^I(\text{PPh}_3)\text{NO}_3$ , or (B) an Au heteroatom from  $\text{Au}^I(\text{PPh}_3)\text{Cl}$ . The required energy in Au-doping is much larger than in Ag-doping (0.599 versus 0.426), demonstrating that (i) the Au-doping process is harder than the Ag doping process, and (ii) the  $\text{Pt}_1 @ \text{Ag}_{12} @ \text{Ag}_{12}(\text{SR})_{18} @ (\text{Cu-PPh}_3)_4$  is more stable than the obtained  $\text{Pt}_1 @ \text{Ag}_{12} @ \text{Ag}_{12}(\text{SR})_{18} @ (\text{Cu-PPh}_3)_3(\text{Au-PPh}_3)_1$ .

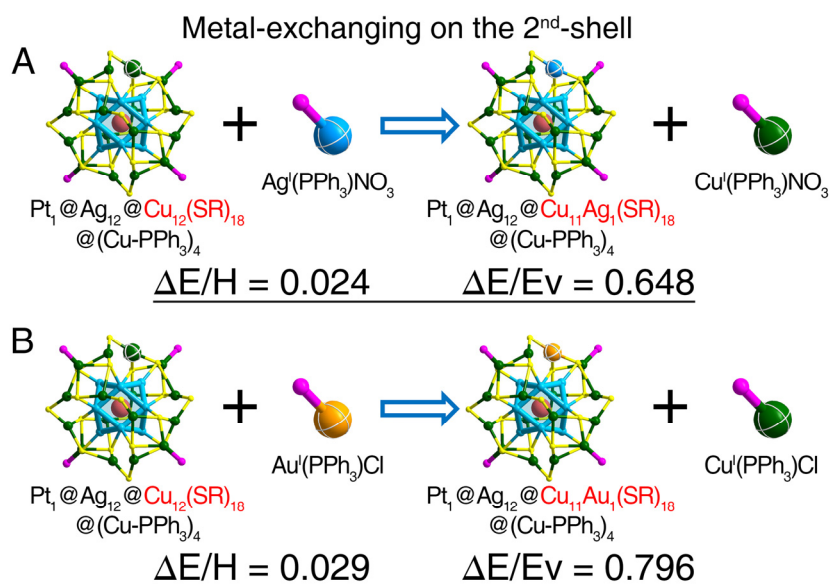

**Fig. S4** Required energy by substituting a 2<sup>nd</sup>-shell Cu atom in  $\text{Pt}_1 @ \text{Ag}_{12} @ \text{Ag}_{12}(\text{SR})_{18} @ (\text{Cu-PPh}_3)_4$  with (A) an Ag heteroatom from  $\text{Ag}^I(\text{PPh}_3)\text{NO}_3$ , or (B) an Au heteroatom from  $\text{Au}^I(\text{PPh}_3)\text{Cl}$ . The required energies is all larger (~30%) than substituting a vertex Cu atom, either for Ag-doping or the Au-doping process. In this context, the metal-exchange location is the vertex, but not the 2<sup>nd</sup>-shell



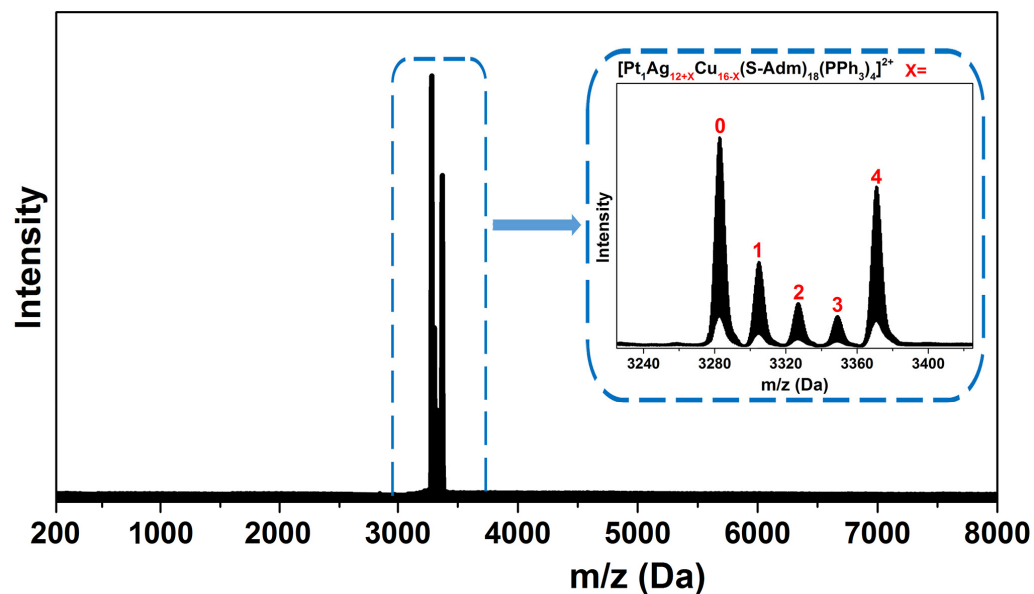

**Fig. S5** Expansion of the ESI-MS spectrum in the 200-8000 Da (inset: 3220-3430 Da range) mass range of the  $[\text{Pt}_1\text{Ag}_{12+x}\text{Cu}_{16-x}(\text{S-Adm})_{18}(\text{PPh}_3)_4]^{2+}$  ( $x = 0-4$ ) nanoclusters.

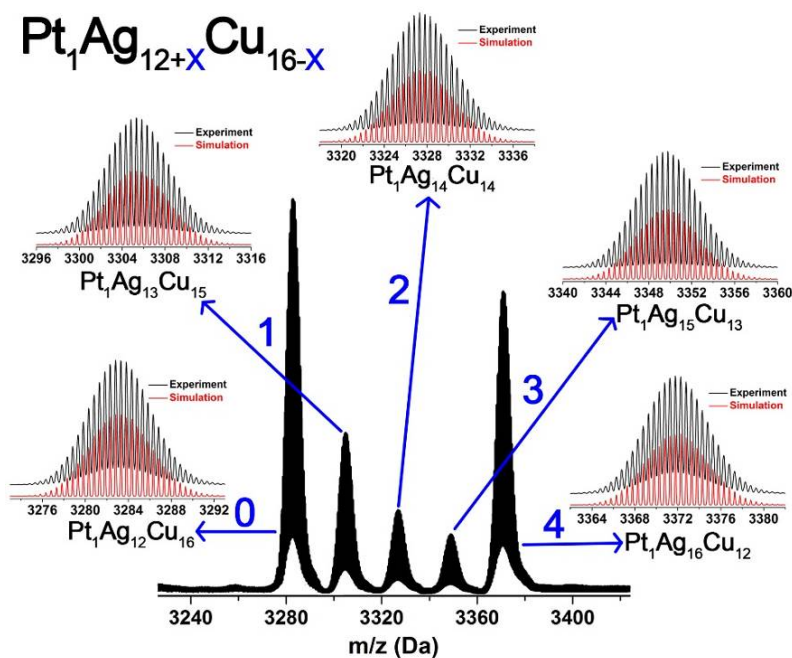

**Fig. S6** ESI-MS spectrum in 3230-3430 Da mass range of the  $[\text{Pt}_1\text{Ag}_{12+x}\text{Cu}_{16-x}(\text{S-Adm})_{18}(\text{PPh}_3)_4]^{2+}$  ( $x = 0-4$ ) nanoclusters. Insets: the experimental (black) and simulated (red) isotope patterns of each component in this mixture.

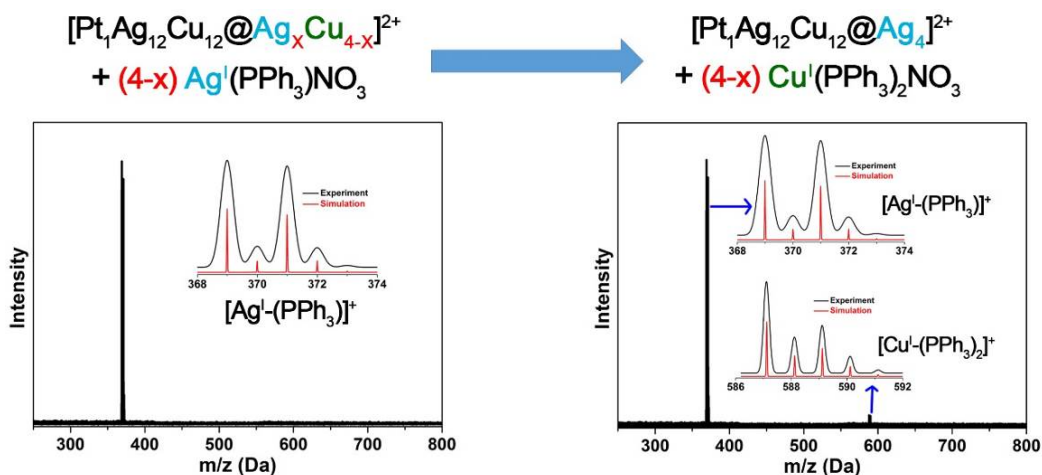

**Fig. S7** ESI-MS spectra of  $[\text{Ag}^+(\text{PPh}_3)]^+$  and the metal-exchanged products (i.e., the mixture of  $[\text{Ag}^+(\text{PPh}_3)]^+$  and  $[\text{Cu}^+(\text{PPh}_3)_2]^+$ ). It should be noted that the  $[\text{Cu}^+(\text{PPh}_3)_2]^+$  is from the  $\text{Pt}_1\text{Ag}_{12}\text{Cu}_{12}@_{\text{Ag}_x\text{Cu}_{4-x}}$  nanoclusters. The reaction equation is:  $\text{Pt}_1\text{Ag}_{12}\text{Cu}_{12}@_{\text{Ag}_x\text{Cu}_{4-x}} + (4-x) \text{Ag}^+(\text{PPh}_3)\text{NO}_3 \rightarrow \text{Pt}_1\text{Ag}_{12}\text{Cu}_{12}@_{\text{Ag}_4} + (4-x) \text{Cu}^+(\text{PPh}_3)_2\text{NO}_3$ .

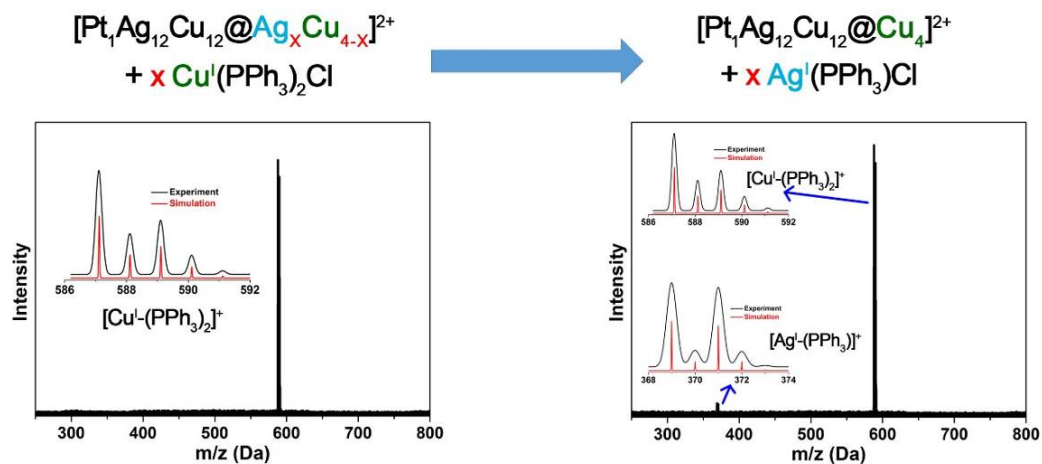

**Fig. S8** ESI-MS spectra of  $[\text{Cu}^+(\text{PPh}_3)_2]^+$  and the metal-exchanged products (i.e., the mixture of  $[\text{Cu}^+(\text{PPh}_3)_2]^+$  and  $[\text{Ag}^+(\text{PPh}_3)]^+$ ). It should be noted that the  $[\text{Ag}^+(\text{PPh}_3)]^+$  is from the  $\text{Pt}_1\text{Ag}_{12}\text{Cu}_{12}@_{\text{Ag}_x\text{Cu}_{4-x}}$  nanoclusters. The reaction equation is:  $\text{Pt}_1\text{Ag}_{12}\text{Cu}_{12}@_{\text{Ag}_x\text{Cu}_{4-x}} + x \text{Cu}^+(\text{PPh}_3)_2\text{Cl} \rightarrow \text{Pt}_1\text{Ag}_{12}\text{Cu}_{12}@_{\text{Cu}_4} + x \text{Ag}^+(\text{PPh}_3)\text{Cl}$ .

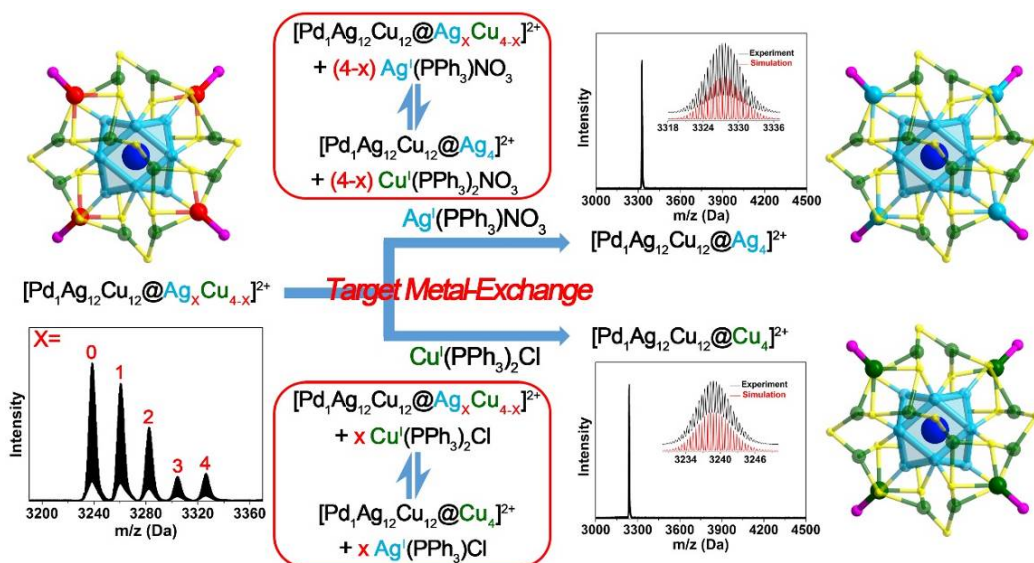

**Fig. S9** Structures and ESI-MS spectra of  $\text{Pd}_1\text{Ag}_{12}\text{Cu}_{12}@Ag_x\text{Cu}_{4-x}$  ( $x = 0-4$ ) and its metal-exchanged products: tri-metallic  $\text{Pd}_1\text{Ag}_{16}\text{Cu}_{12}$  and  $\text{Pd}_1\text{Ag}_{12}\text{Cu}_{16}$  nanoclusters with mono-dispersity. Insets: experimental and simulated isotope patterns of each nanocluster. Red boxes: schematic illustration of the metal-exchange process (also the size-concentration process). Color codes: cerulean sphere, Ag; blue sphere, Pd; green sphere, Cu; red sphere, mixed Ag/Cu; yellow sphere, S; purple sphere, P. For clarity, the carbon and hydrogen atoms are not shown.

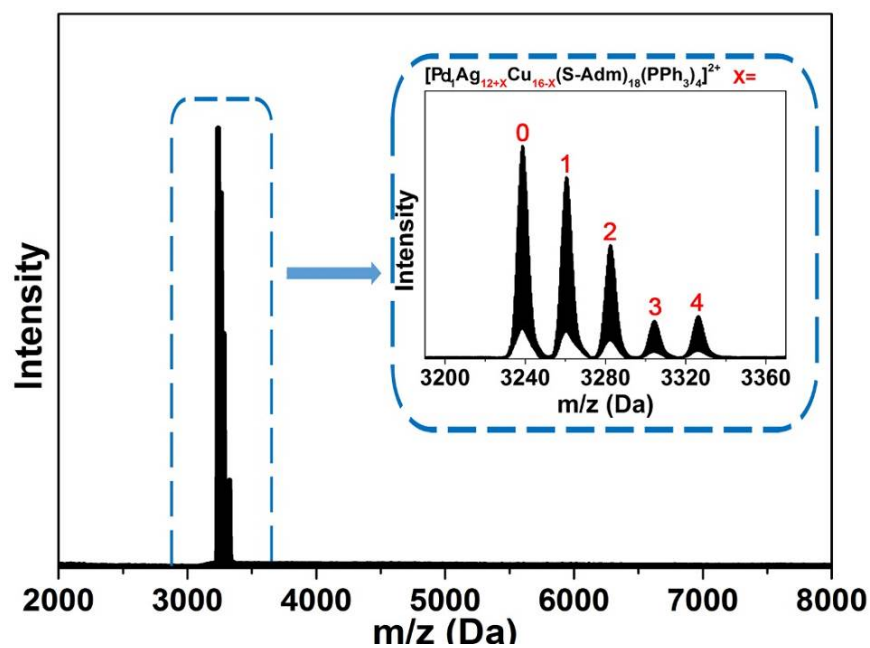

**Fig. S10** Expansion of the ESI-MS spectrum in 2000-8000 Da (inset: 3190-3370 Da range) mass range of the  $[\text{Pd}_1\text{Ag}_{12+x}\text{Cu}_{16-x}(\text{S-Adm})_{18}(\text{PPh}_3)_4]^{2+}$  ( $x = 0-4$ ) nanoclusters.

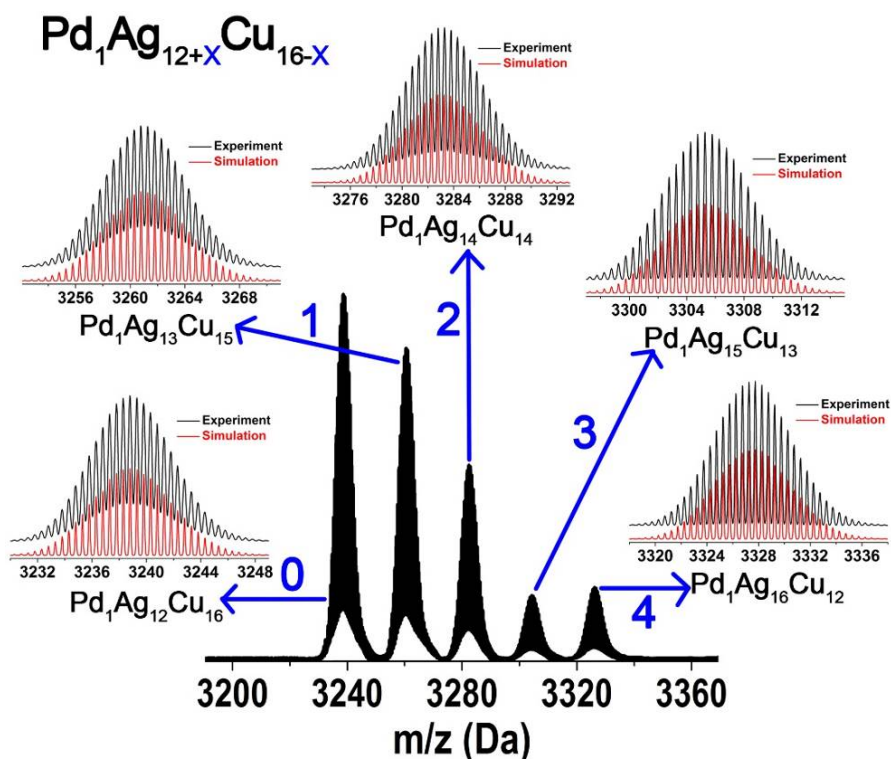

**Fig. S11** ESI-MS spectrum in 3190-3370 Da mass range of the  $[\text{Pd}_1\text{Ag}_{12+x}\text{Cu}_{16-x}(\text{S-Adm})_{18}(\text{PPh}_3)_4]^{2+}$  ( $x = 0-4$ ) nanoclusters. Insets: the experimental (black) and simulated (red) isotope patterns of each component in this mixture.

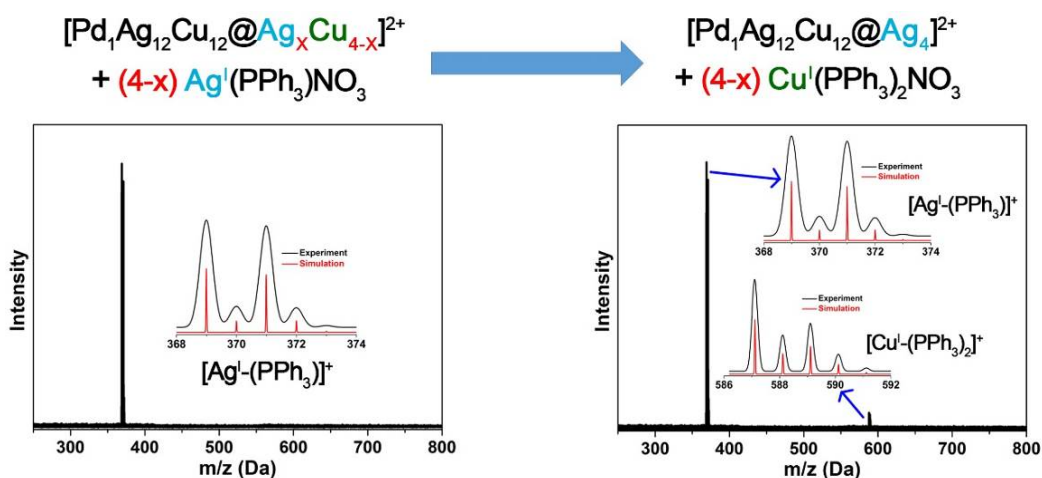

**Fig. S12** ESI-MS spectra of  $[\text{Ag}^+(\text{PPh}_3)]^+$  and the metal-exchanged products (i.e., the mixture of  $[\text{Ag}^+(\text{PPh}_3)]^+$  and  $[\text{Cu}^+(\text{PPh}_3)_2]^+$ ). It should be noted that the  $[\text{Cu}^+(\text{PPh}_3)_2]^+$  is from the  $\text{Pd}_1\text{Ag}_{12}\text{Cu}_{12}@Ag_x\text{Cu}_{4-x}$  nanoclusters. The reaction equation is:  $\text{Pd}_1\text{Ag}_{12}\text{Cu}_{12}@Ag_x\text{Cu}_{4-x} + (4-x) \text{Ag}^+(\text{PPh}_3)\text{NO}_3 \rightarrow \text{Pd}_1\text{Ag}_{12}\text{Cu}_{12}@Ag_4 + (4-x) \text{Cu}^+(\text{PPh}_3)_2\text{NO}_3$ .

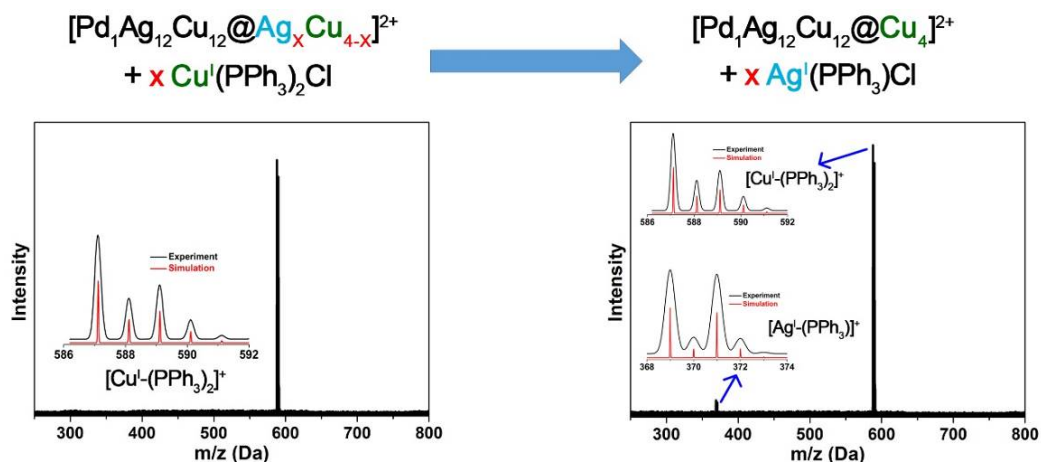

**Fig. S13** ESI-MS spectra of  $[\text{Cu}^{\text{I}}(\text{PPh}_3)_2]^+$  and the metal-exchanged products (i.e., the mixture of  $[\text{Cu}^{\text{I}}(\text{PPh}_3)_2]^+$  and  $[\text{Ag}^{\text{I}}(\text{PPh}_3)]^+$ ). It should be noted that the  $[\text{Ag}^{\text{I}}(\text{PPh}_3)]^+$  is from the  $\text{Pd}_1\text{Ag}_{12}\text{Cu}_{12}@_{\text{Ag}_x\text{Cu}_{4-x}}$  nanoclusters. The reaction equation is:  $\text{Pd}_1\text{Ag}_{12}\text{Cu}_{12}@_{\text{Ag}_x\text{Cu}_{4-x}} + x \text{Cu}^{\text{I}}(\text{PPh}_3)_2\text{Cl} \rightarrow \text{Pd}_1\text{Ag}_{12}\text{Cu}_{12}@_{\text{Cu}_4} + x \text{Ag}^{\text{I}}(\text{PPh}_3)\text{Cl}$ .

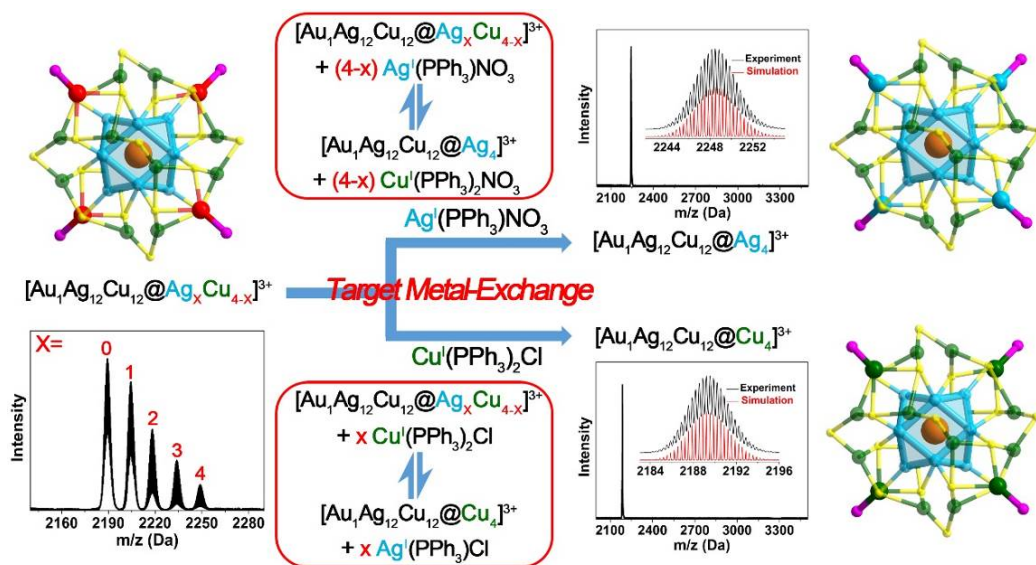

**Fig. S14** Structures and ESI-MS spectra of  $\text{Au}_1\text{Ag}_{12}\text{Cu}_{12}@_{\text{Ag}_x\text{Cu}_{4-x}}$  ( $x = 0-4$ ) and its metal-exchanged products: tri-metallic  $\text{Au}_1\text{Ag}_{16}\text{Cu}_{12}$  and  $\text{Au}_1\text{Ag}_{12}\text{Cu}_{16}$  nanoclusters with mono-dispersity. Insets: experimental and simulated isotope patterns of each nanocluster. Red boxes: schematic illustration of the metal-exchange process (also the size-concentration process). Color codes: cerulean sphere, Ag; orange sphere, Au; green sphere, Cu; red sphere, mixed Ag/Cu; yellow sphere, S; purple sphere, P. For clarity, the carbon and hydrogen atoms are not shown.

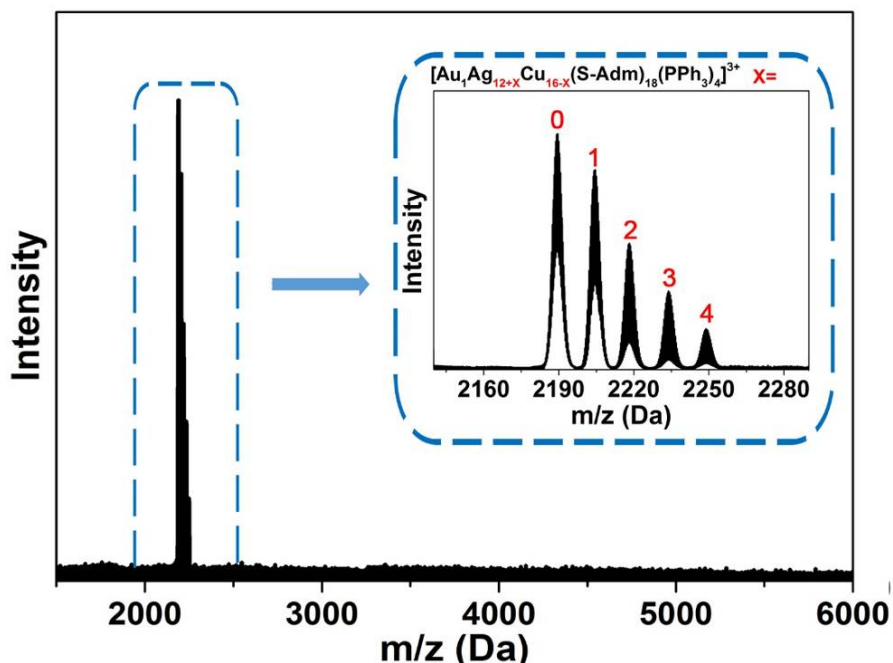

**Fig. S15** Expansion of the ESI-MS spectrum in 1500-6000 Da (inset: 2140-2295 Da range) mass range of the  $[\text{Au}_1\text{Ag}_{12+x}\text{Cu}_{16-x}(\text{S-Adm})_{18}(\text{PPh}_3)_4]^{3+}$  ( $x = 0-4$ ) nanoclusters.

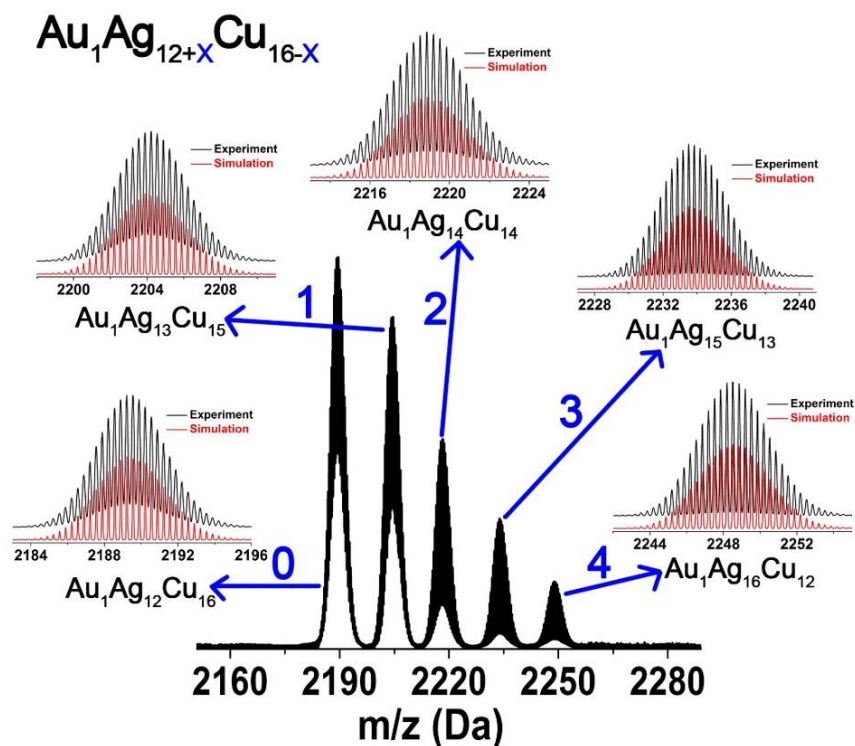

**Fig. S16** ESI-MS spectrum in 3190-3370 Da mass range of the  $[\text{Au}_1\text{Ag}_{12+x}\text{Cu}_{16-x}(\text{S-Adm})_{18}(\text{PPh}_3)_4]^{2+}$  ( $x = 0-4$ ) nanoclusters. Insets: the experimental (black) and simulated (red) isotope patterns of each component in this mixture.

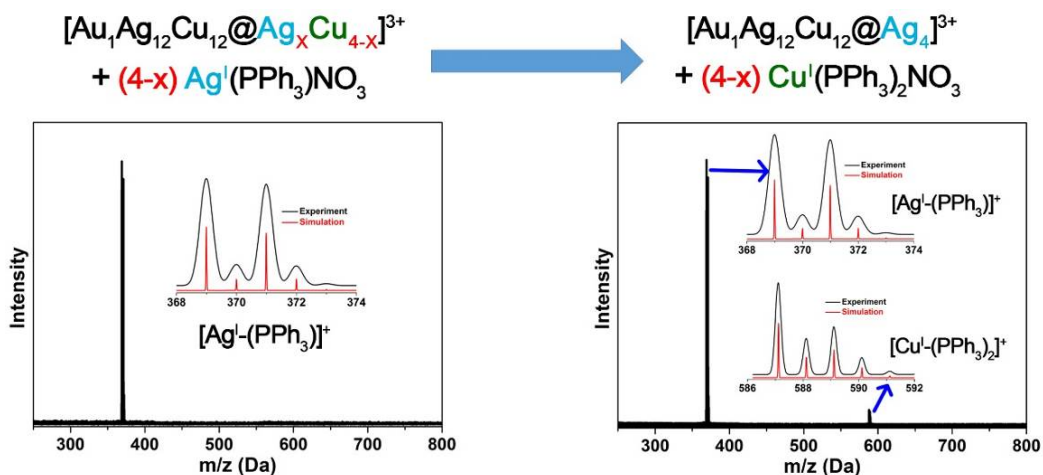

**Fig. S17** ESI-MS spectra of  $[\text{Ag}^l(\text{PPh}_3)]^+$  and the metal-exchanged products (i.e., the mixture of  $[\text{Ag}^l(\text{PPh}_3)]^+$  and  $[\text{Cu}^l(\text{PPh}_3)_2]^+$ ). It should be noted that the  $[\text{Cu}^l(\text{PPh}_3)_2]^+$  is from the  $\text{Au}_1\text{Ag}_{12}\text{Cu}_{12}@Ag_x\text{Cu}_{4-x}$  nanoclusters. The reaction equation is:  $\text{Au}_1\text{Ag}_{12}\text{Cu}_{12}@Ag_x\text{Cu}_{4-x} + (4-x) \text{Ag}^l(\text{PPh}_3)\text{NO}_3 \rightarrow \text{Au}_1\text{Ag}_{12}\text{Cu}_{12}@Ag_4 + (4-x) \text{Cu}^l(\text{PPh}_3)_2\text{NO}_3$ .

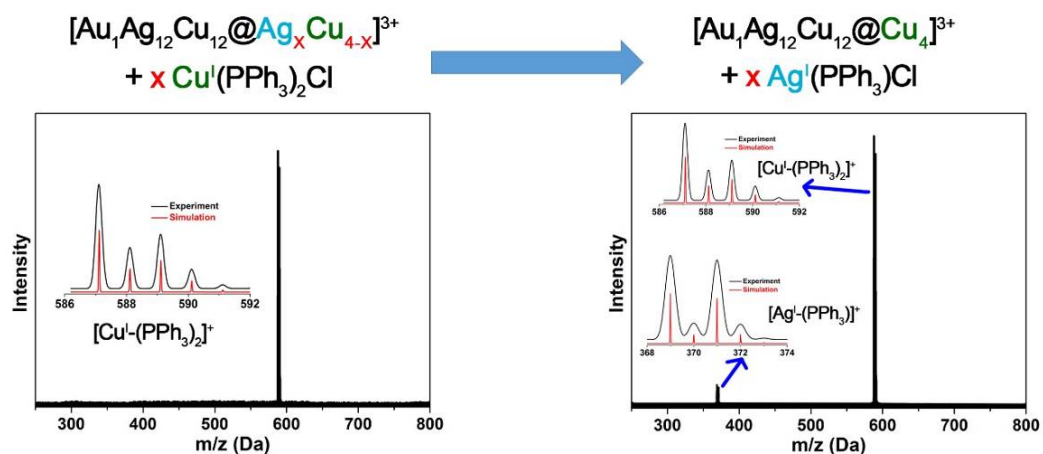

**Fig. S18** ESI-MS spectra of  $[\text{Cu}^l(\text{PPh}_3)_2]^+$  and the metal-exchanged products (i.e., the mixture of  $[\text{Cu}^l(\text{PPh}_3)_2]^+$  and  $[\text{Ag}^l(\text{PPh}_3)]^+$ ). It should be noted that the  $[\text{Ag}^l(\text{PPh}_3)]^+$  is from the  $\text{Au}_1\text{Ag}_{12}\text{Cu}_{12}@Ag_x\text{Cu}_{4-x}$  nanoclusters. The reaction equation is:  $\text{Au}_1\text{Ag}_{12}\text{Cu}_{12}@Ag_x\text{Cu}_{4-x} + x \text{Cu}^l(\text{PPh}_3)_2\text{Cl} \rightarrow \text{Au}_1\text{Ag}_{12}\text{Cu}_{12}@Cu_4 + x \text{Ag}^l(\text{PPh}_3)\text{Cl}$ .

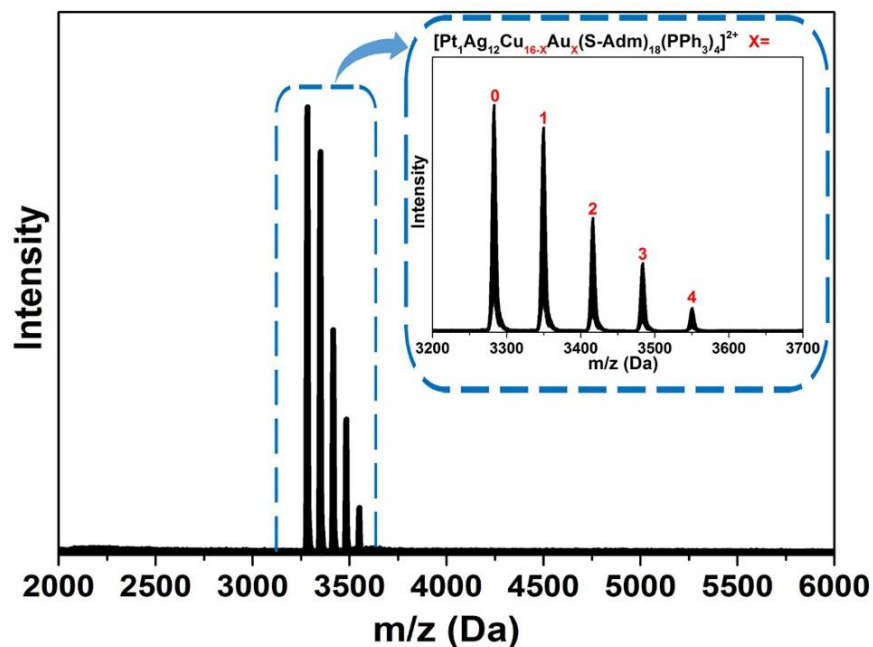

**Fig. S19** Expansion of the ESI-MS spectrum in 2000-6000 Da (inset: 3200-3700 Da range) mass range of the  $[Pt_1Ag_{12}Cu_{16-x}Au_x(S-Adm)_{18}(PPh_3)_4]^{3+}$  ( $x = 0-4$ ) nanoclusters.

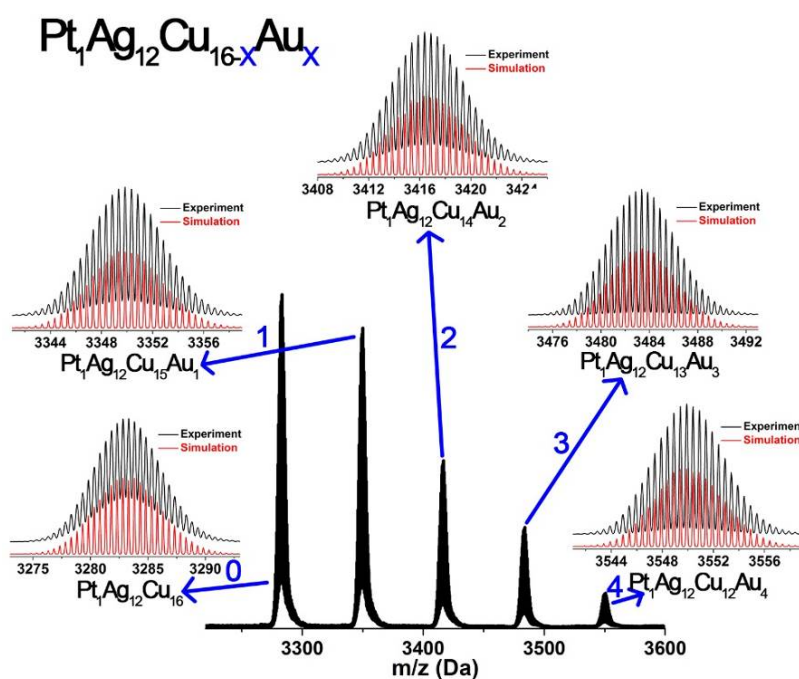

**Fig. S20** ESI-MS spectrum in 3200-3700 Da mass range of the  $[Pt_1Ag_{12}Cu_{16-x}Au_x(S-Adm)_{18}(PPh_3)_4]^{3+}$  ( $x = 0-4$ ). Insets: the experimental (black) and simulated (red) isotope patterns of each component in this mixture.



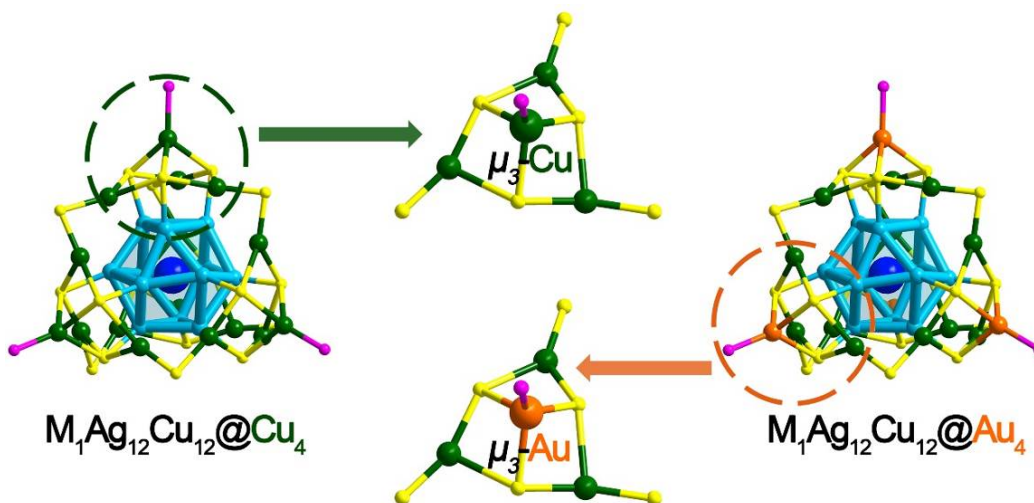

**Fig. S21** Structures of  $\mu_3$ -Cu and  $\mu_3$ -Au in the vertical sites (i.e.,  $M_1(PPh_3)_1@Cu_3(S-Adm)_6$ ,  $M=Cu/Au$ ). Color codes: cerulean sphere, Ag; blue sphere, Pd; green sphere, Cu; orange sphere, Au; yellow sphere, S; purple sphere, P. For clarity, the carbon and hydrogen atoms are not shown.

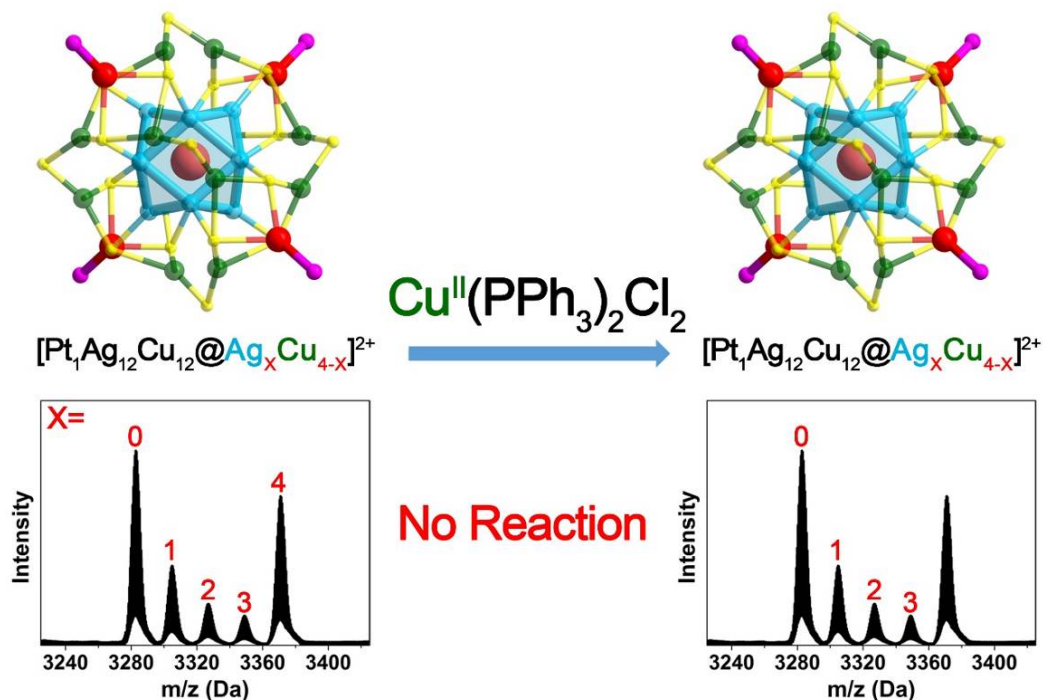

**Fig. S22** Schematic illustration of the no coordination ability of the Cu(II) in the vertical sites, and thus the composition of  $Pt_1Ag_{12}Cu_{12}@Ag_xCu_{4-x}$  nanoclusters maintains. Color codes: cerulean sphere, Ag; pink sphere, Pt; green sphere, Cu; red sphere, mixed Ag/Cu; yellow sphere, S; purple sphere, P. For clarity, the carbon and hydrogen atoms are not shown.

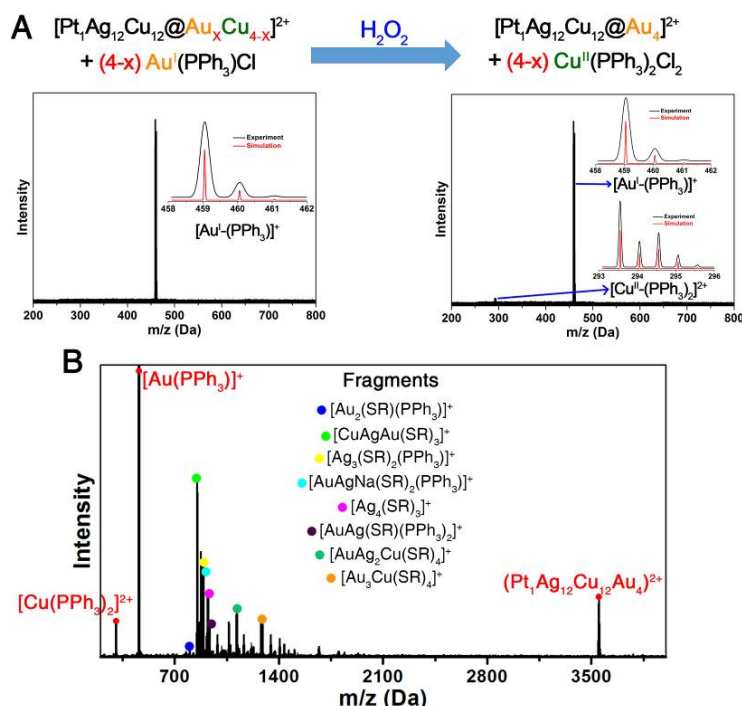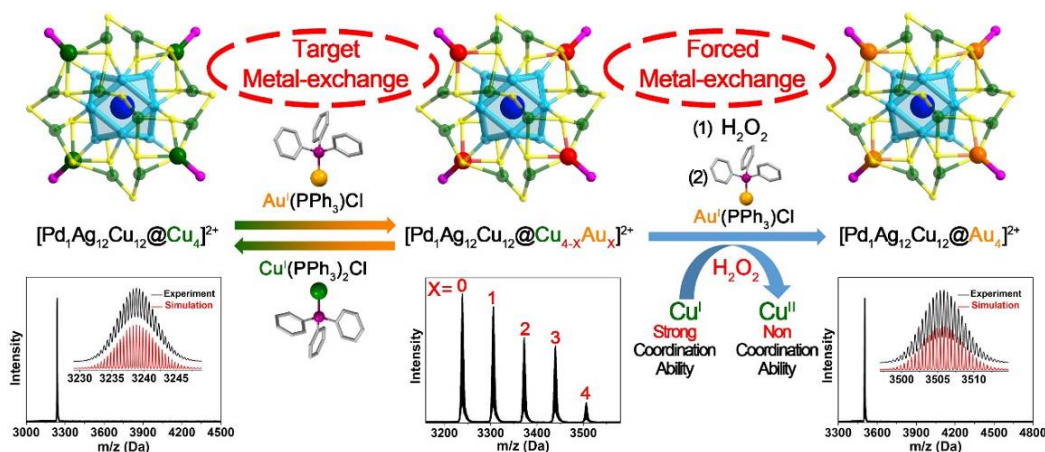

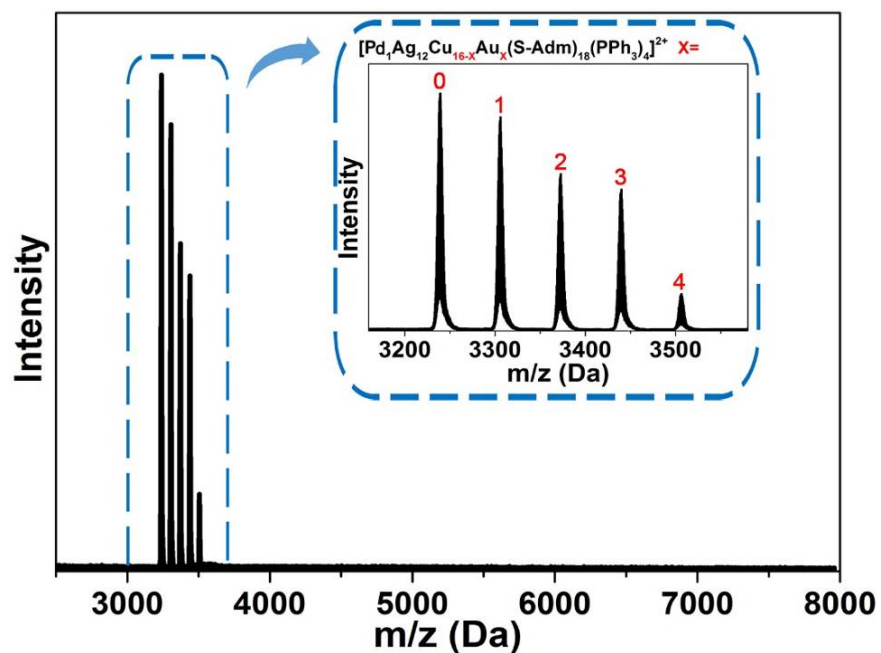

**Fig. S25** Expansion of the ESI-MS spectrum in 2500-8000 Da (inset: 3150-3650 Da range) mass range of the  $[\text{Pd}_1\text{Ag}_{12}\text{Cu}_{16-x}\text{Au}_x(\text{S-Adm})_{18}(\text{PPh}_3)_4]^{3+}$  ( $x = 0-4$ ) nanoclusters.

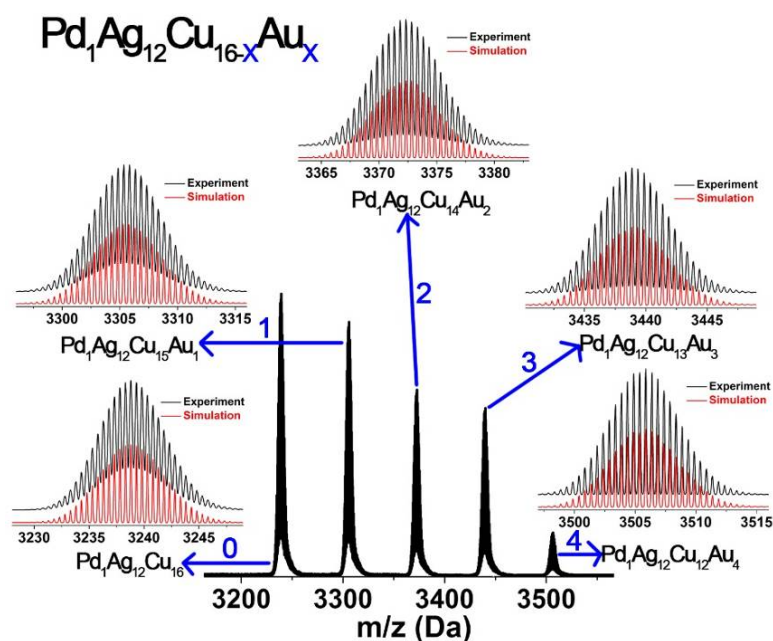

**Fig. S26** ESI-MS spectrum in 3150-3650 Da mass range of the  $[\text{Pd}_1\text{Ag}_{12}\text{Cu}_{16-x}\text{Au}_x(\text{S-Adm})_{18}(\text{PPh}_3)_4]^{3+}$  ( $x = 0-4$ ). Insets: the experimental (black) and simulated (red) isotope patterns of each component in this mixture.

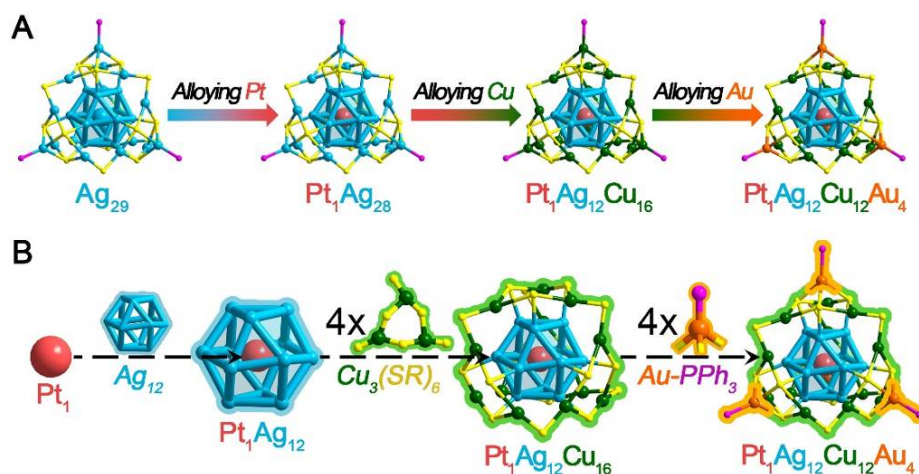

**Fig. S27** (A) Illustration of the systematic  $M_{29}$  nanosystem. Note that there are a total of three nanosystems, i.e., Pt-centered, Pd-centered, and Au-centered  $M_{29}$  nanosystems. Here we only show part of the Pt-centered nanosystem, including the mono-metallic  $Ag_{29}$ , bi-metallic  $Pt_1Ag_{28}$ , tri-metallic  $Pt_1Ag_{12}Cu_{16}$ , and tetra-metallic  $Pt_1Ag_{12}Cu_{12}Au_4$  nanoclusters. (B) Structural anatomy of the tetra-metallic  $Pt_1Ag_{12}Cu_{12}Au_4$  nanocluster with the Pt (center) $@Ag_{12}(1^{st}\text{-shell})@Cu_{12}(2^{nd}\text{-shell})@Au_4(\text{vertex})$  tetra-stratified arrangement. Color codes: cerulean sphere, Ag; pink sphere, Pt; orange sphere, Au; green sphere, Cu; yellow sphere, S; purple sphere, P. For clarity, the carbon and hydrogen atoms are not shown.

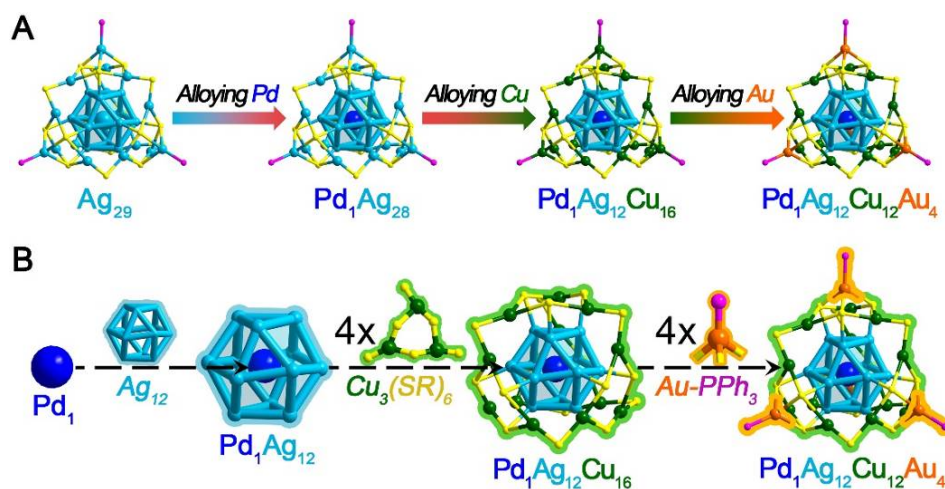

**Fig. S28** (A) Illustration of the  $M_{29}$  nanosystem. Noted that there are a total of three nanosystems, i.e., Pt-centered, Pd-centered, and Au-centered  $M_{29}$  nanosystems. There we just show part of the Pd-centered nanosystem, including the mono-metallic  $Ag_{29}$ , bi-metallic  $Pd_1Ag_{28}$ , tri-metallic  $Pd_1Ag_{12}Cu_{16}$ , and tetra-metallic  $Pd_1Ag_{12}Cu_{12}Au_4$  nanoclusters. (B) Structural anatomy of the tetra-metallic  $Pd_1Ag_{12}Cu_{12}Au_4$  nanocluster with the Pd (center) $@Ag_{12}(1^{st}\text{-shell})@Cu_{12}(2^{nd}\text{-shell})@Au_4(\text{vertex})$  tetra-stratified arrangement. Color codes: cerulean sphere, Ag; blue sphere, Pd; orange sphere, Au; green sphere, Cu; yellow sphere, S; purple sphere, P. For clarity, the carbon and hydrogen atoms are not shown.

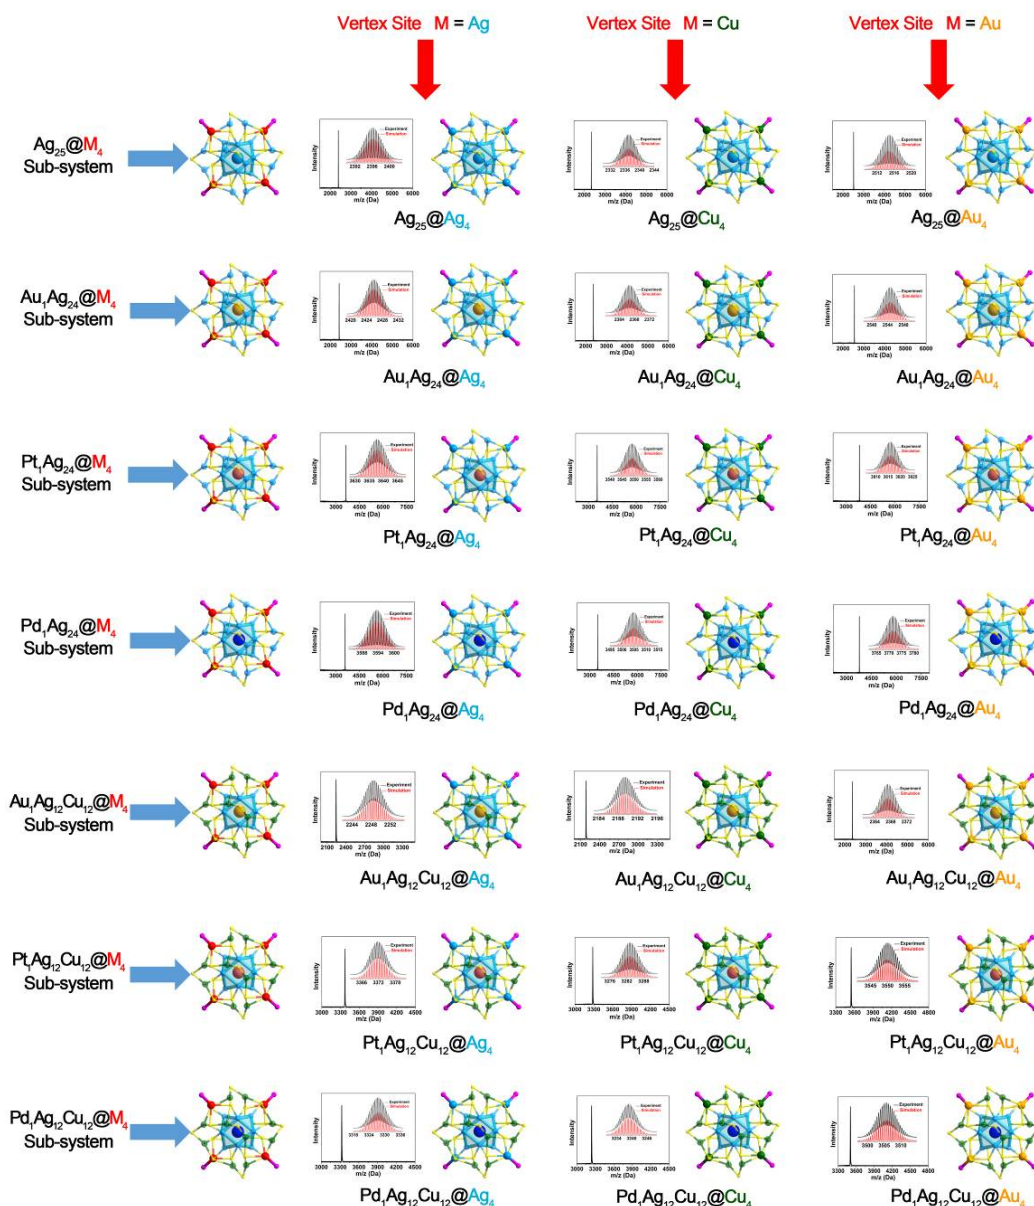

**Fig. S29** Overview of the  $M_{29}$  ( $M = \text{Ag}/\text{Cu}/\text{Pt}/\text{Pd}/\text{Au}$ ) nanocluster library. Comparison of the ESI-MS spectra and structural configurations of these  $M_{29}$  nanoclusters. These nanoclusters could be classified into 7 sub-systems by classifying the metal arrangement. Blue arrows represent the nanoclusters with the same center@1<sup>st</sup>-shell@2<sup>nd</sup>-shell arrangements but with different vertex atoms (Ag/Cu/Au). Each sub-system contains three nanoclusters (*i.e.*, with Ag, Cu or Au vertex occupation (red arrows)). Color codes: cerulean sphere, Ag; green sphere, Cu; pink sphere, Pt; blue sphere, Pd; orange sphere, Au; yellow sphere, S; purple sphere, P. For clarity, the C and H atoms are omitted.

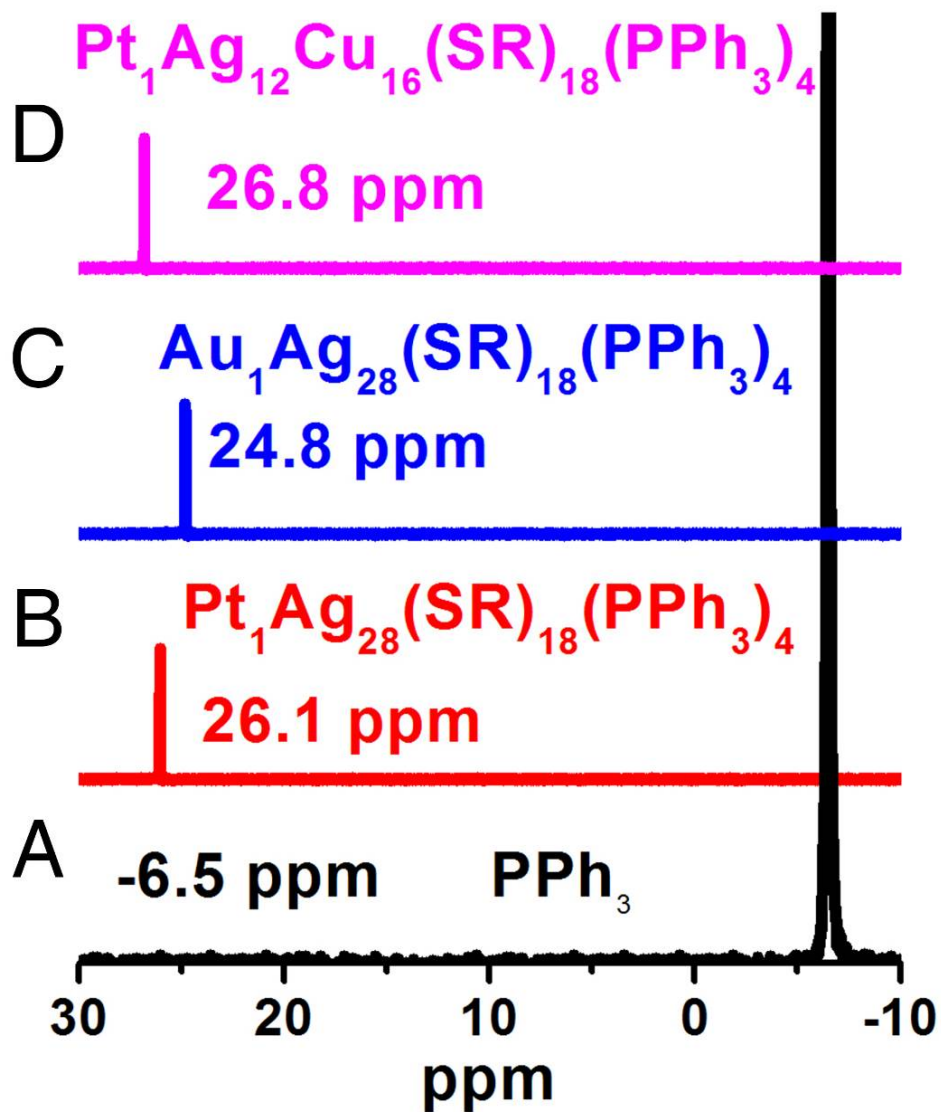

**Fig. S30**  $^{31}\text{P}$  NMR spectra of (A)  $\text{PPh}_3$  ligand, (B)  $\text{Pt}_1\text{Ag}_{28}(\text{SR})_{18}(\text{PPh}_3)_4$  nanocluster, (C)  $\text{Au}_1\text{Ag}_{28}(\text{SR})_{18}(\text{PPh}_3)_4$  nanocluster, and (D)  $\text{Pt}_1\text{Ag}_{12}\text{Cu}_{16}(\text{SR})_{18}(\text{PPh}_3)_4$  nanocluster. Samples are dissolved in  $\text{CD}_2\text{Cl}_2$ .

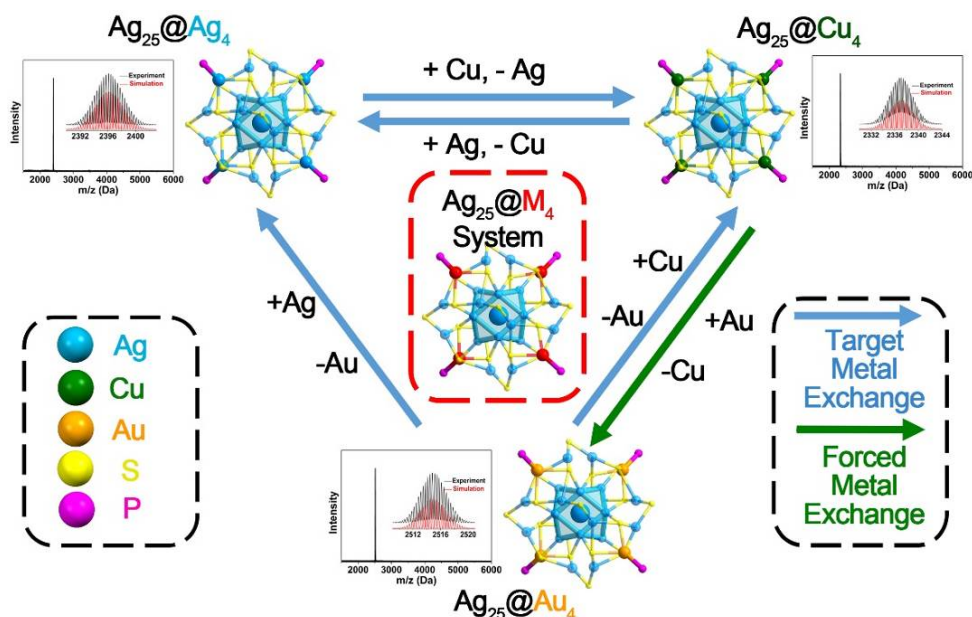

**Fig. S31** Illustration (with structures and ESI-MS spectra) of the  $\text{Ag}_{25}@M_4$  nanosystem composed by  $\text{Ag}_{29}$ ,  $\text{Ag}_{25}\text{Cu}_4$  and  $\text{Ag}_{25}\text{Au}_4$  nanoclusters. Insets of the ESI-MS data: experimental and simulated isotope patterns of each nanocluster. The blue and green arrows indicate the alloying modes with target metal exchange and forced metal exchange. Color codes: cerulean sphere, Ag; orange sphere, Au; green sphere, Cu; yellow sphere, S; purple sphere, P. For clarity, the carbon and hydrogen atoms are not shown.

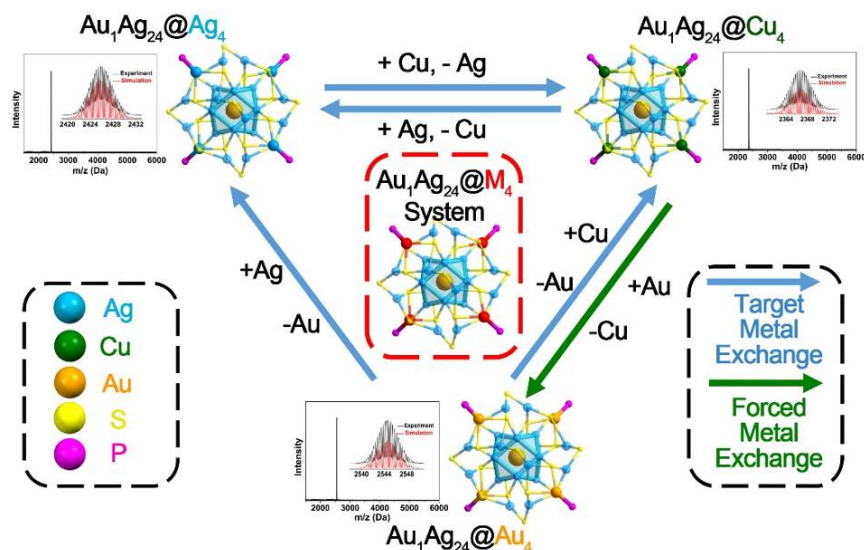

**Fig. S32** Illustration (with structures and ESI-MS spectra) of the  $\text{Au}_1\text{Ag}_{24}@M_4$  nanosystem composed by  $\text{Au}_1\text{Ag}_{28}$ ,  $\text{Au}_1\text{Ag}_{24}\text{Cu}_4$  and  $\text{Au}_5\text{Ag}_{24}$  nanoclusters. Insets of the ESI-MS data: experimental and simulated isotope patterns of each nanocluster. The blue and green arrows indicate the alloying modes with target metal exchange and forced metal exchange. Color codes: cerulean sphere, Ag; orange sphere, Au; green sphere, Cu; yellow sphere, S; purple sphere, P. For clarity, the carbon and hydrogen atoms are not shown.

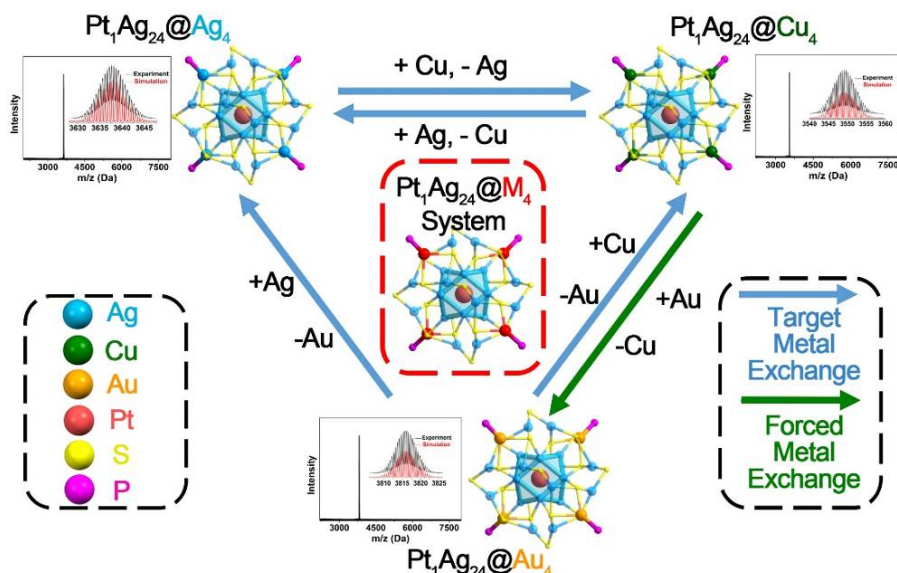

**Fig. S33** Illustration (with structures and ESI-MS spectra) of the  $Pt_1Ag_{24}@M_4$  nanosystem composed by  $Pt_1Ag_{28}$ ,  $Pt_1Ag_{24}Cu_4$  and  $Pt_1Ag_{24}Au_4$  nanoclusters. Insets of the ESI-MS data: experimental and simulated isotope patterns of each nanocluster. The blue and green arrows indicate the alloying modes with target metal exchange and forced metal exchange. Color codes: pink sphere, Pt; cerulean sphere, Ag; orange sphere, Au; green sphere, Cu; yellow sphere, S; purple sphere, P. For clarity, the carbon and hydrogen atoms are not shown.

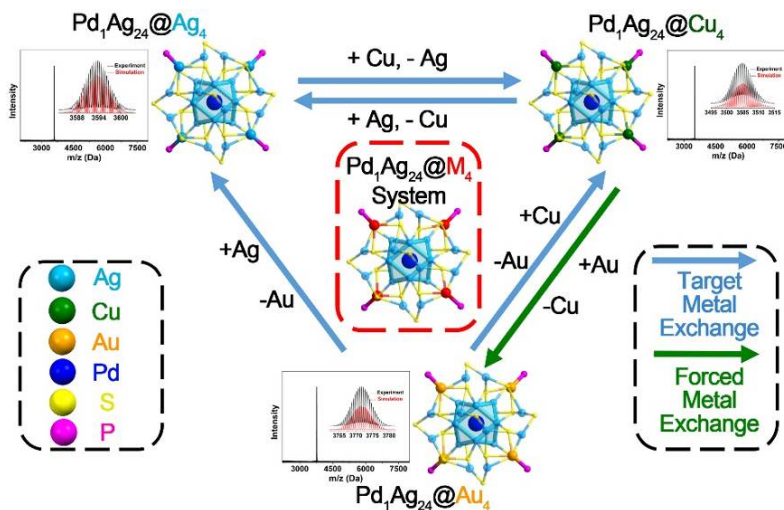

**Fig. S34** Illustration (with structures and ESI-MS spectra) of the  $Pd_1Ag_{24}@M_4$  nanosystem composed by  $Pd_1Ag_{28}$ ,  $Pd_1Ag_{24}Cu_4$  and  $Pd_1Ag_{24}Au_4$  nanoclusters. Insets of the ESI-MS data: experimental and simulated isotope patterns of each nanocluster. The blue and green arrows indicate the alloying modes with target metal exchange and forced metal exchange. Color codes: cerulean sphere, Ag; blue sphere, Pd; orange sphere, Au; green sphere, Cu; yellow sphere, S; purple sphere, P. For clarity, the carbon and hydrogen atoms are not shown.



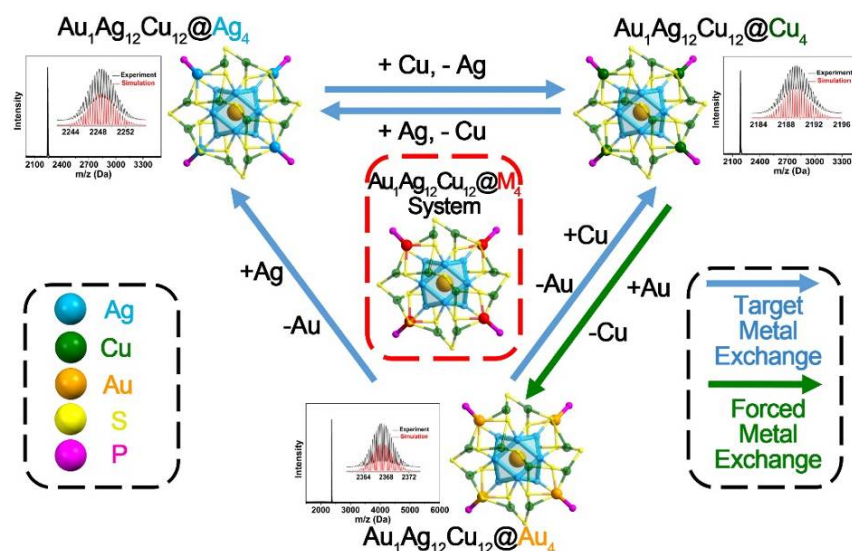

**Fig. S35** Illustration (with structures and ESI-MS spectra) of the  $\text{Au}_1\text{Ag}_{12}\text{Cu}_{12}@M_4$  nanosystem composed by  $\text{Au}_1\text{Ag}_{16}\text{Cu}_{12}$ ,  $\text{Au}_1\text{Ag}_{12}\text{Cu}_{16}$  and  $\text{Au}_5\text{Ag}_{12}\text{Cu}_{12}$  nanoclusters. Insets of the ESI-MS data: experimental and simulated isotope patterns of each nanocluster. The blue and green arrows indicate the alloying modes with target metal exchange and forced metal exchange. Color codes: cerulean sphere, Ag; orange sphere, Au; green sphere, Cu; yellow sphere, S; purple sphere, P. For clarity, the carbon and hydrogen atoms are not shown.

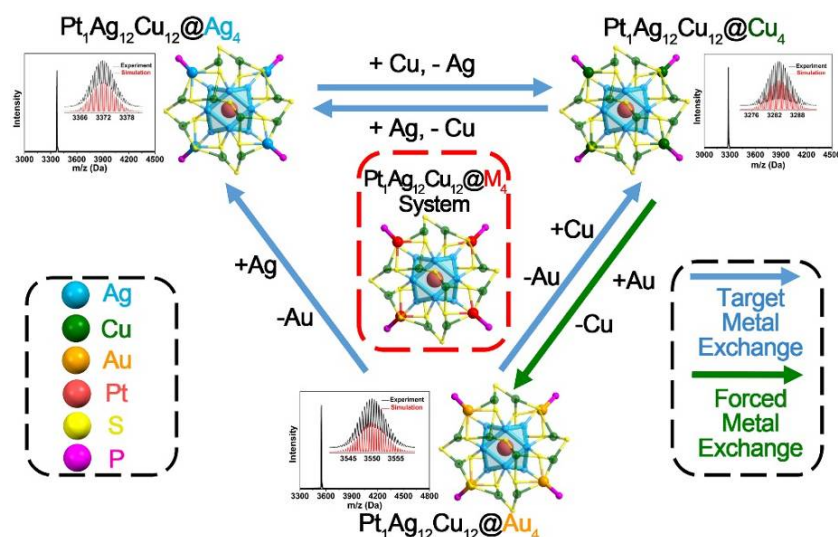

**Fig. S36** Illustration (with structures and ESI-MS spectra) of the  $\text{Pt}_1\text{Ag}_{12}\text{Cu}_{12}@M_4$  nanosystem composed by  $\text{Pt}_1\text{Ag}_{16}\text{Cu}_{12}$ ,  $\text{Pt}_1\text{Ag}_{12}\text{Cu}_{16}$  and  $\text{Pt}_1\text{Ag}_{12}\text{Cu}_{12}\text{Au}_4$  nanoclusters. Insets of the ESI-MS data: experimental and simulated isotope patterns of each nanocluster. The blue and green arrows indicate the alloying modes with target metal exchange and forced metal exchange. Color codes: pink sphere, Pt; cerulean sphere, Ag; orange sphere, Au; green sphere, Cu; yellow sphere, S; purple sphere, P. For clarity, the carbon and hydrogen atoms are not shown.

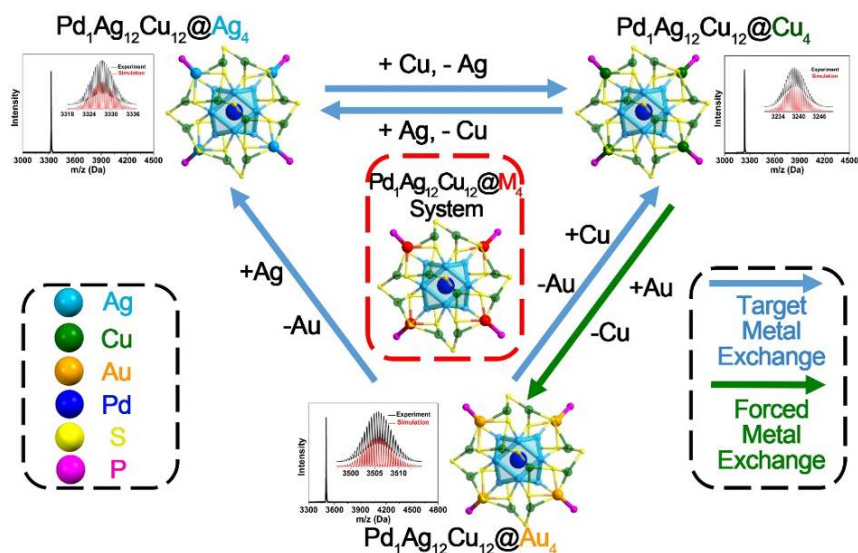

**Fig. S37** Illustration (with structures and ESI-MS spectra) of the  $\text{Pd}_1\text{Ag}_{12}\text{Cu}_{12}@M_4$  nanosystem composed by  $\text{Pd}_1\text{Ag}_{16}\text{Cu}_{12}$ ,  $\text{Pd}_1\text{Ag}_{12}\text{Cu}_{16}$  and  $\text{Pd}_1\text{Ag}_{12}\text{Cu}_{12}\text{Au}_4$  nanoclusters. Insets of the ESI-MS data: experimental and simulated isotope patterns of each nanocluster. The blue and green arrows indicate the alloying modes with target metal exchange and forced metal exchange. Color legend: blue sphere, Pd; cerulean sphere, Ag; orange sphere, Au; green sphere, Cu; yellow sphere, S; purple sphere, P. For clarity, the carbon and hydrogen atoms are not shown.

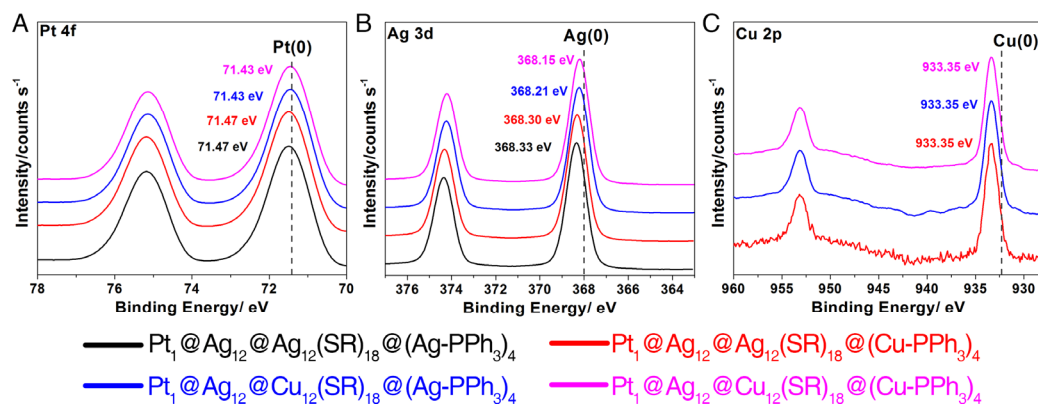

**Fig. S38** XPS of Pt 4f, Ag 3d, and Cu 2p peaks in Pt-centered nanoclusters. Black lines:  $\text{Pt}_1@Ag_{12}@Ag_{12}(SR)_{18}@(Ag-PPh_3)_4$  nanocluster; red lines:  $\text{Pt}_1@Ag_{12}@Ag_{12}(SR)_{18}@(Cu-PPh_3)_4$  nanocluster; blue lines:  $\text{Pt}_1@Ag_{12}@Cu_{12}(SR)_{18}@(Ag-PPh_3)_4$  nanocluster; purple lines:  $\text{Pt}_1@Ag_{12}@Cu_{12}(SR)_{18}@(Cu-PPh_3)_4$  nanocluster.

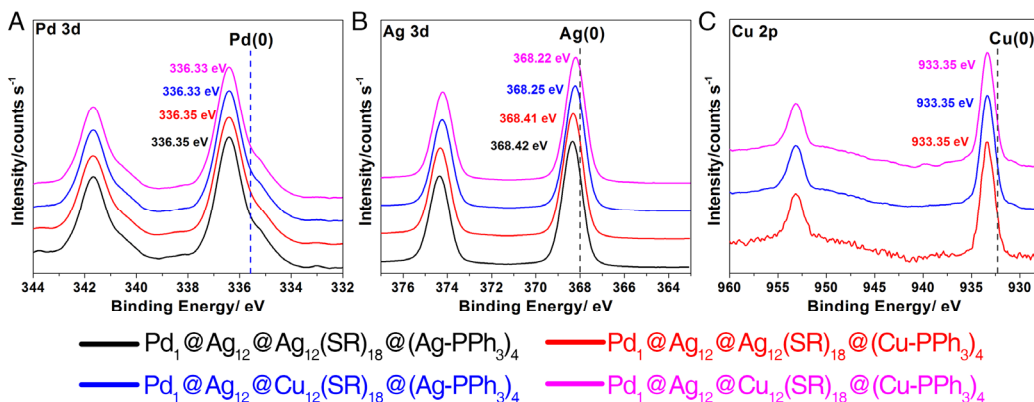

**Fig. S39** XPS of Pd 3d, Ag 3d, and Cu 2p peaks in Pd-centered nanoclusters. Black lines: Pd<sub>1</sub>@Ag<sub>12</sub>@Ag<sub>12</sub>(SR)<sub>18</sub>@(Ag-PPh<sub>3</sub>)<sub>4</sub> nanocluster; red lines: Pd<sub>1</sub>@Ag<sub>12</sub>@Ag<sub>12</sub>(SR)<sub>18</sub>@(Cu-PPh<sub>3</sub>)<sub>4</sub> nanocluster; blue lines: Pd<sub>1</sub>@Ag<sub>12</sub>@Cu<sub>12</sub>(SR)<sub>18</sub>@(Ag-PPh<sub>3</sub>)<sub>4</sub> nanocluster; purple lines: Pd<sub>1</sub>@Ag<sub>12</sub>@Cu<sub>12</sub>(SR)<sub>18</sub>@(Cu-PPh<sub>3</sub>)<sub>4</sub> nanocluster.

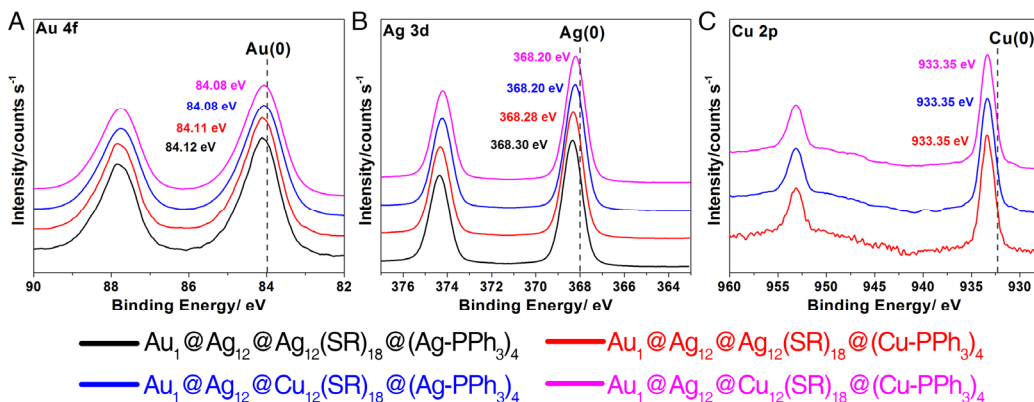

**Fig. S40** XPS of Au 4f, Ag 3d, and Cu 2p peaks in Au-centered nanoclusters. Black lines: Au<sub>1</sub>@Ag<sub>12</sub>@Ag<sub>12</sub>(SR)<sub>18</sub>@(Ag-PPh<sub>3</sub>)<sub>4</sub> nanocluster; red lines: Au<sub>1</sub>@Ag<sub>12</sub>@Ag<sub>12</sub>(SR)<sub>18</sub>@(Cu-PPh<sub>3</sub>)<sub>4</sub> nanocluster; blue lines: Au<sub>1</sub>@Ag<sub>12</sub>@Cu<sub>12</sub>(SR)<sub>18</sub>@(Ag-PPh<sub>3</sub>)<sub>4</sub> nanocluster; purple lines: Au<sub>1</sub>@Ag<sub>12</sub>@Cu<sub>12</sub>(SR)<sub>18</sub>@(Cu-PPh<sub>3</sub>)<sub>4</sub> nanocluster. From the XPS results (Figs. S38-S40), we concluded that: (i) for the kernel atom (Pt/Pd/Au): altering the vertex metals between Ag and Cu has almost no effect on the XPS results of the kernel atom (*e.g.*, from Pt<sub>1</sub>@Ag<sub>12</sub>@Ag<sub>12</sub>(SR)<sub>18</sub>@(Ag-PPh<sub>3</sub>)<sub>4</sub> to Pt<sub>1</sub>@Ag<sub>12</sub>@Ag<sub>12</sub>(SR)<sub>18</sub>@(Cu-PPh<sub>3</sub>)<sub>4</sub>); by comparison, the XPS peaks of the kernel atom blue-shift (shift to the M(0) peak) by altering the metals in 3<sup>rd</sup>-shell from Ag to Cu (*e.g.*, from Pt<sub>1</sub>@Ag<sub>12</sub>@Ag<sub>12</sub>(SR)<sub>18</sub>@(Ag-PPh<sub>3</sub>)<sub>4</sub> to Pt<sub>1</sub>@Ag<sub>12</sub>@Cu<sub>12</sub>(SR)<sub>18</sub>@(Ag-PPh<sub>3</sub>)<sub>4</sub>). (ii) for the Ag atom: altering the vertex metals from Ag to Cu slightly blue-shift the XPS peak of Ag (*e.g.*, from Pt<sub>1</sub>@Ag<sub>12</sub>@Ag<sub>12</sub>(SR)<sub>18</sub>@(Ag-PPh<sub>3</sub>)<sub>4</sub> to Pt<sub>1</sub>@Ag<sub>12</sub>@Ag<sub>12</sub>(SR)<sub>18</sub>@(Cu-PPh<sub>3</sub>)<sub>4</sub>); by comparison, the Ag peak shows a significant blue-shift when the Ag atoms in the 3<sup>rd</sup>-shell are substituted by the Cu atoms (*e.g.*, from Pt<sub>1</sub>@Ag<sub>12</sub>@Ag<sub>12</sub>(SR)<sub>18</sub>@(Ag-PPh<sub>3</sub>)<sub>4</sub> to Pt<sub>1</sub>@Ag<sub>12</sub>@Cu<sub>12</sub>(SR)<sub>18</sub>@(Ag-PPh<sub>3</sub>)<sub>4</sub>). (iii) for the Cu atom: the introduced Cu atoms can be only arranged at the 3<sup>rd</sup> shell or the vertex, and the XPS results demonstrated that all introduced Cu atoms display an almost unchanged oxidation state.

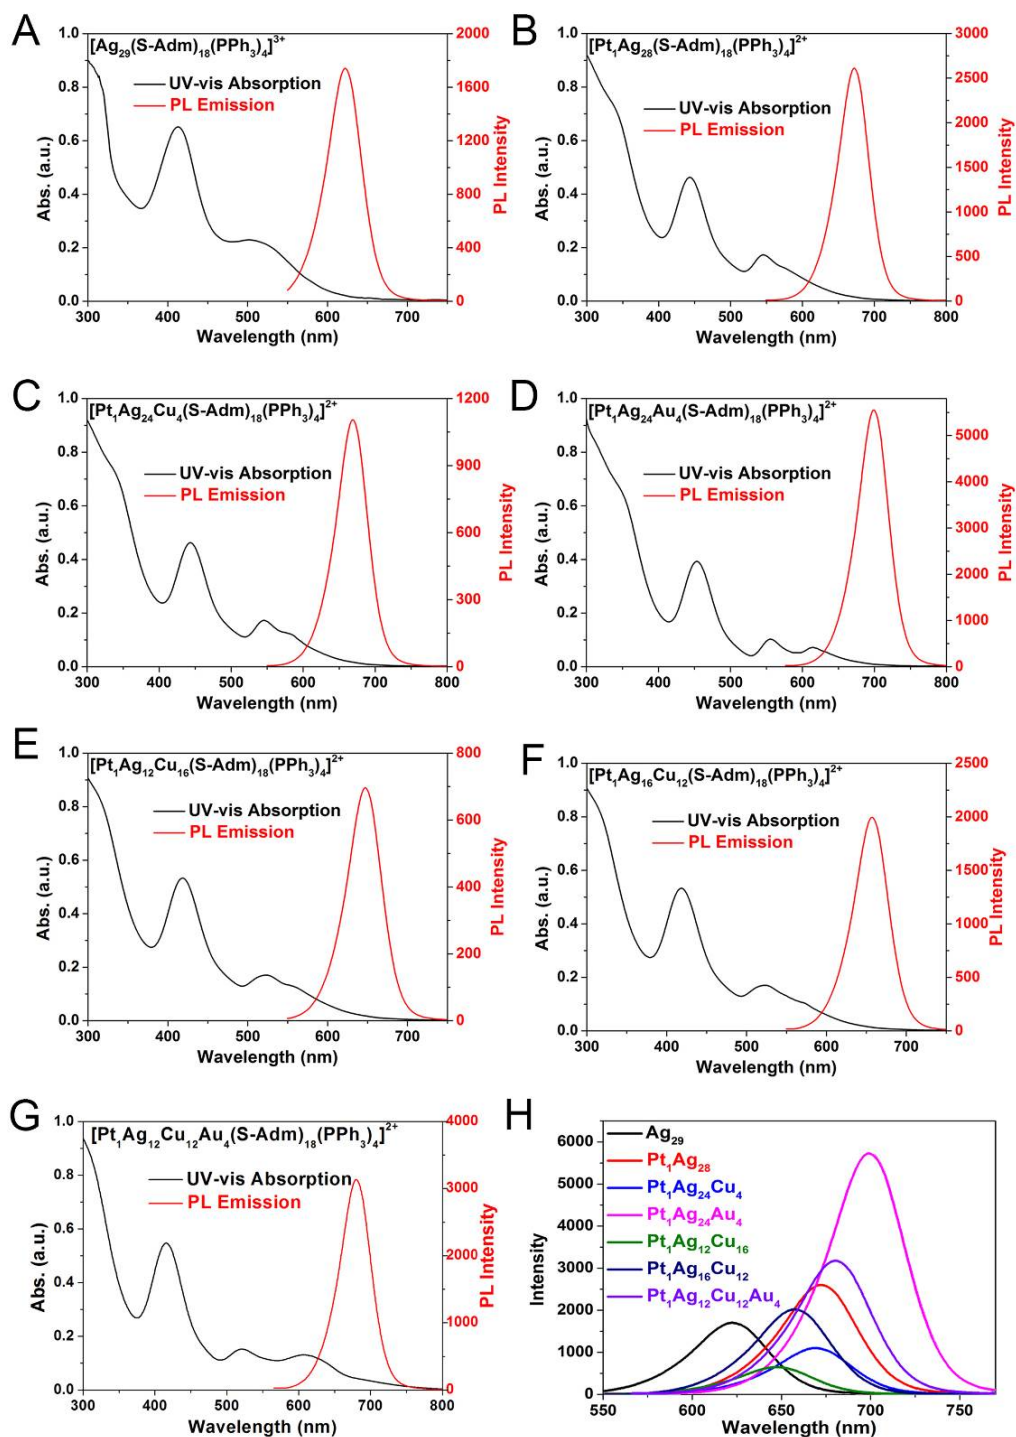

**Fig. S41** UV-vis absorption and PL spectra of (A) mono-metallic  $Ag_{29}$ , (B) bi-metallic  $Pt_1Ag_{28}$ , (C) tri-metallic  $Pt_1Ag_{24}Cu_4$ , (D) tri-metallic  $Pt_1Ag_{24}Au_4$ , (E) tri-metallic  $Pt_1Ag_{12}Cu_{16}$ , (F) tri-metallic  $Pt_1Ag_{16}Cu_{12}$ , and (G) tetra-metallic  $Pt_1Ag_{12}Cu_{12}Au_4$  nanoclusters. (H) Comparison of the PL wavelength and intensity of each nanocluster in the Pt-centered  $M_{29}$  nanosystem.

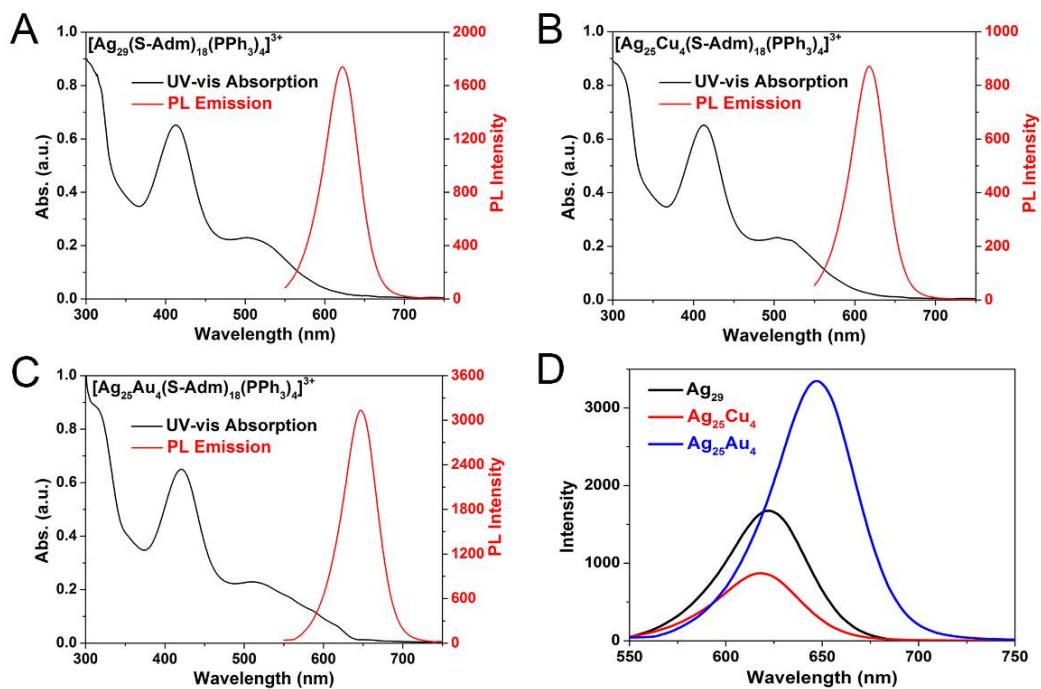

**Fig. S42** UV-vis absorption and the PL spectra of (A)  $[\text{Ag}_{29}(\text{S-Adm})_{18}(\text{PPh}_3)_4]^{3+}$ , (B)  $[\text{Ag}_{25}\text{Cu}_4(\text{S-Adm})_{18}(\text{PPh}_3)_4]^{3+}$ , and (C)  $[\text{Ag}_{25}\text{Au}_4(\text{S-Adm})_{18}(\text{PPh}_3)_4]^{3+}$ . (D) Comparison of the emission wavelength and intensity of each nanocluster in the Ag-centered M<sub>29</sub> nanosystem.

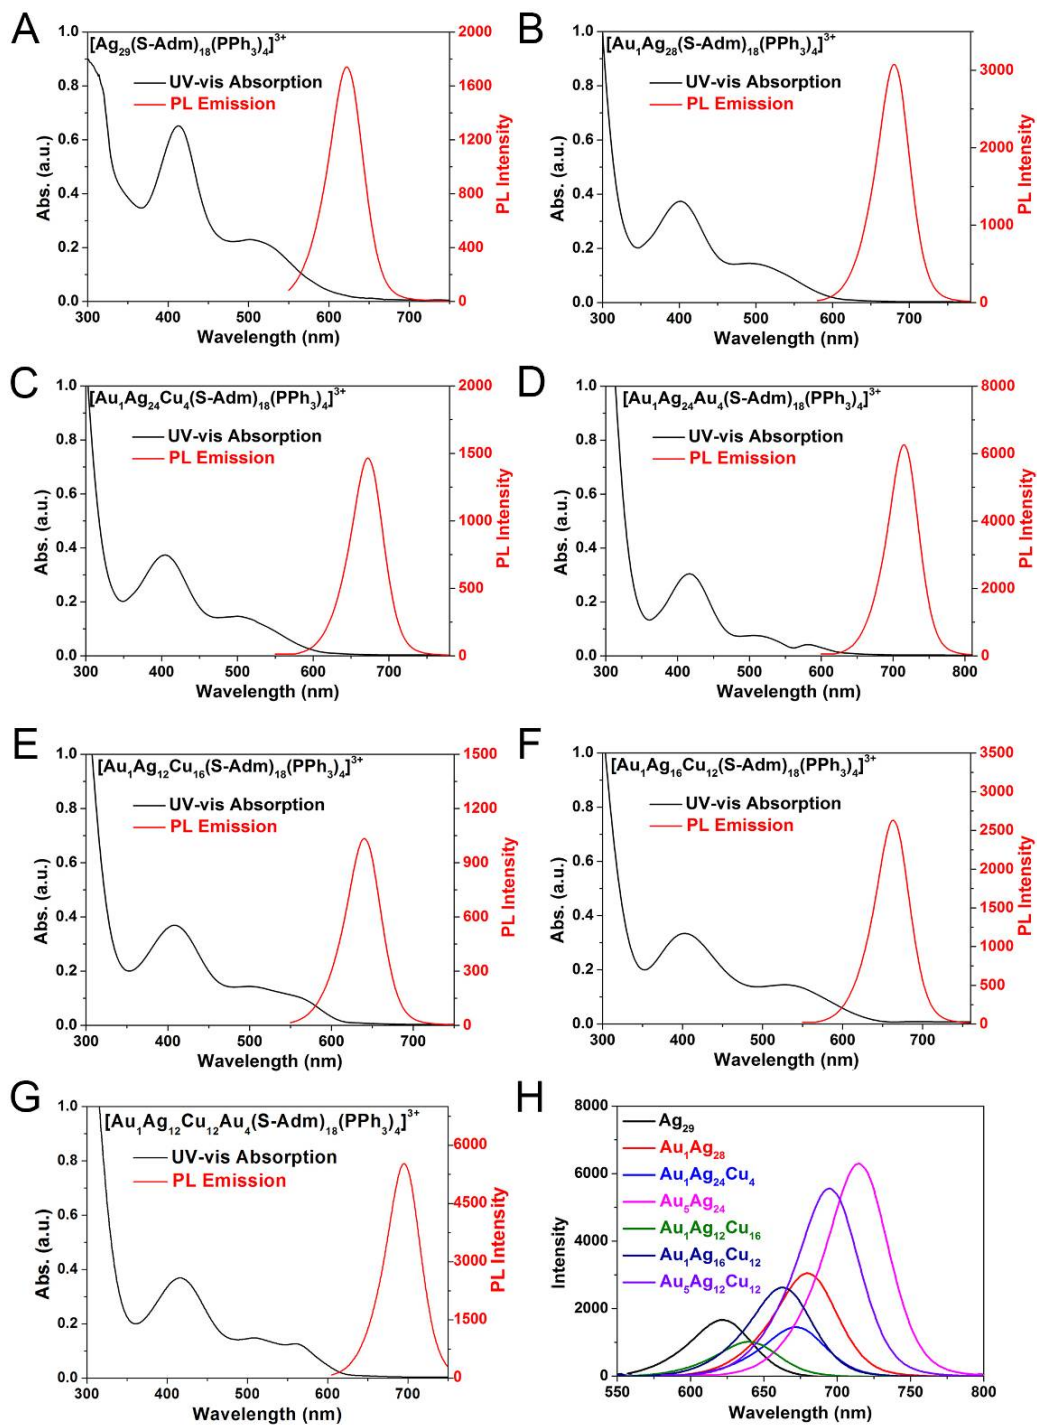

**Fig. S43** UV-vis absorption and the PL spectra of (A)  $[Ag_{29}(S-Adm)_{18}(PPh_3)_4]^{3+}$ , (B)  $[Au_1Ag_{28}(S-Adm)_{18}(PPh_3)_4]^{3+}$ , (C)  $[Au_1Ag_{24}Cu_4(S-Adm)_{18}(PPh_3)_4]^{3+}$ , (D)  $[Au_1Ag_{24}Au_1(S-Adm)_{18}(PPh_3)_4]^{3+}$ , (E)  $[Au_1Ag_{12}Cu_{16}(S-Adm)_{18}(PPh_3)_4]^{3+}$ , (F)  $[Au_1Ag_{16}Cu_{12}(S-Adm)_{18}(PPh_3)_4]^{3+}$  and (G)  $[Au_5Ag_{12}Cu_{12}(S-Adm)_{18}(PPh_3)_4]^{3+}$  nanoclusters. (H) Comparison of the emission wavelength and intensity of each nanocluster in the Au-centered  $M_{29}$  nanosystem.

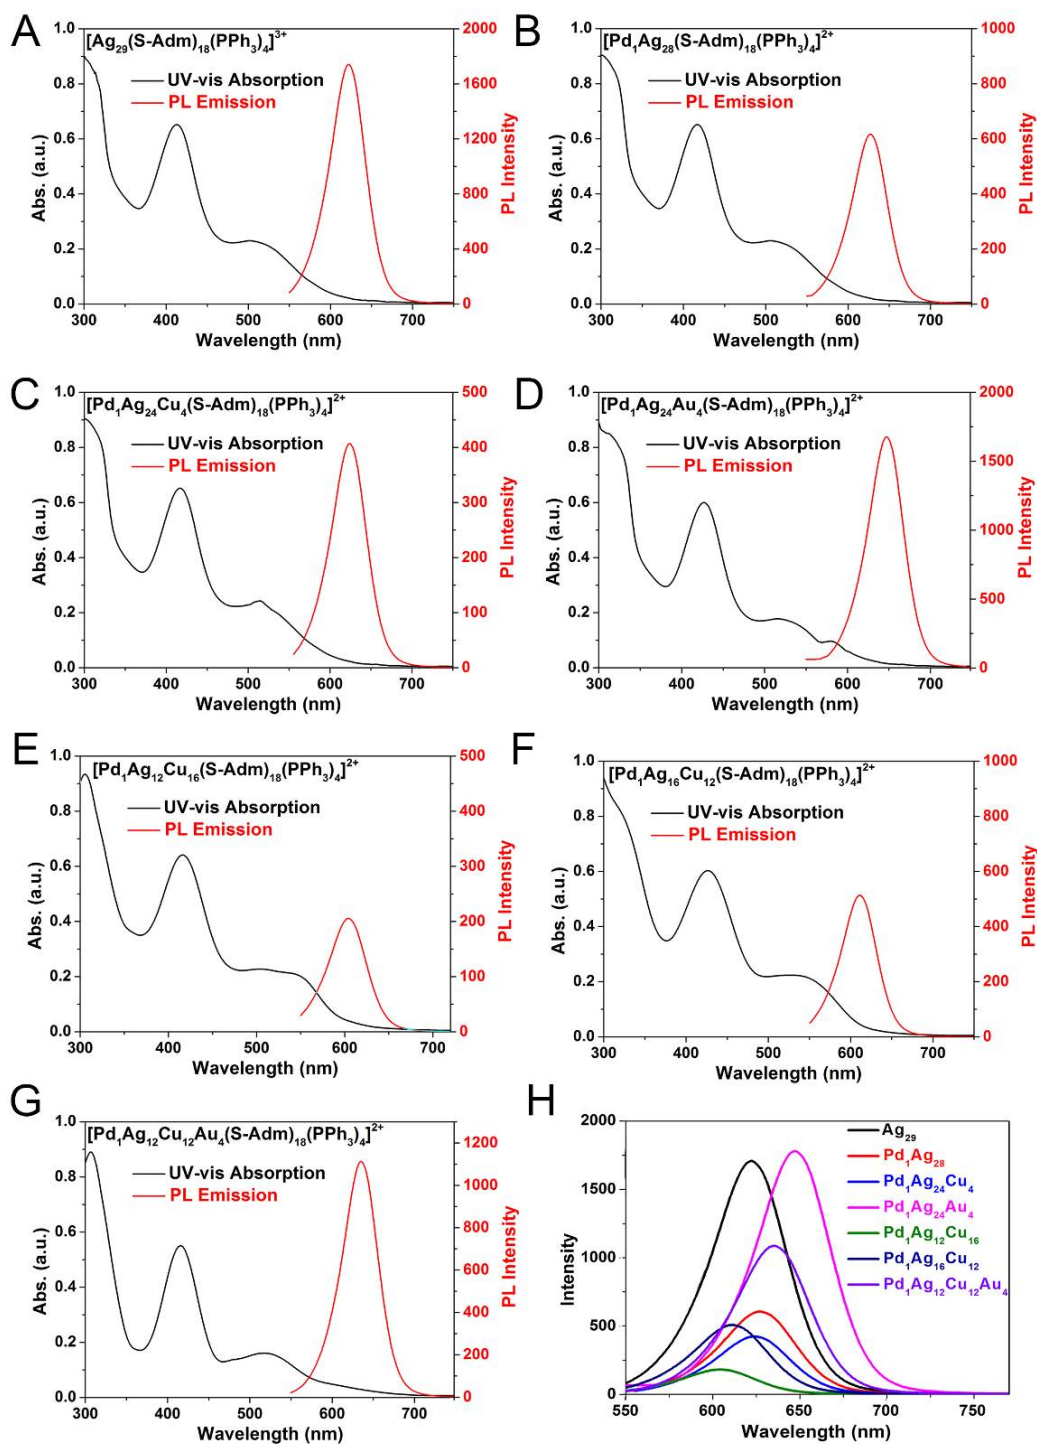

**Fig. S44** UV-vis absorption and the PL spectra of (A)  $[\text{Ag}_{29}(\text{S-Adm})_{18}(\text{PPh}_3)_4]^{3+}$ , (B)  $[\text{Pd}_1\text{Ag}_{28}(\text{S-Adm})_{18}(\text{PPh}_3)_4]^{2+}$ , (C)  $[\text{Pd}_1\text{Ag}_{24}\text{Cu}_4(\text{S-Adm})_{18}(\text{PPh}_3)_4]^{2+}$ , (D)  $[\text{Pd}_1\text{Ag}_{24}\text{Au}_4(\text{S-Adm})_{18}(\text{PPh}_3)_4]^{2+}$ , (E)  $[\text{Pd}_1\text{Ag}_{12}\text{Cu}_{16}(\text{S-Adm})_{18}(\text{PPh}_3)_4]^{2+}$ , (F)  $[\text{Pd}_1\text{Ag}_{16}\text{Cu}_{12}(\text{S-Adm})_{18}(\text{PPh}_3)_4]^{2+}$ , and (G)  $[\text{Pd}_1\text{Ag}_{12}\text{Cu}_{12}\text{Au}_4(\text{S-Adm})_{18}(\text{PPh}_3)_4]^{2+}$  nanoclusters. (H) Comparison of the emission wavelength and intensity of each nanocluster in the Pd-centered M<sub>29</sub> nanosystem.

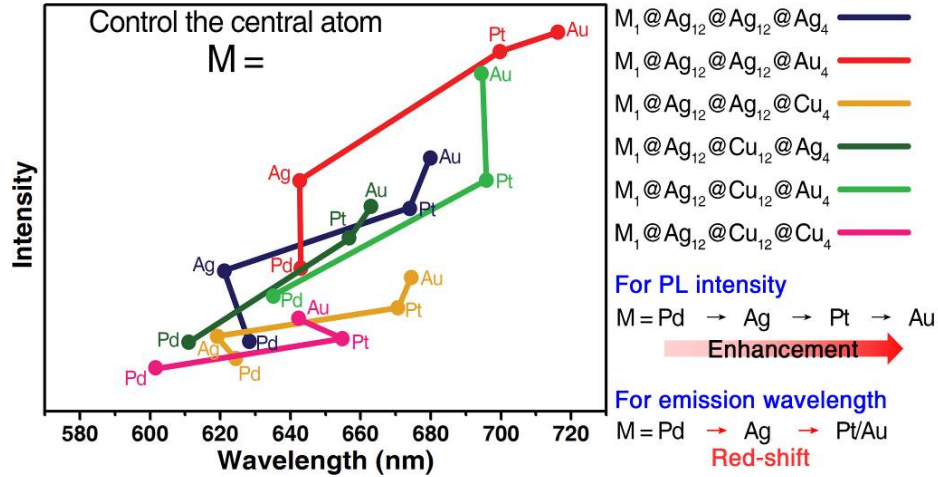

Fig. 45 Correlations between the central atom and PL property of the  $M_{29}$  system.

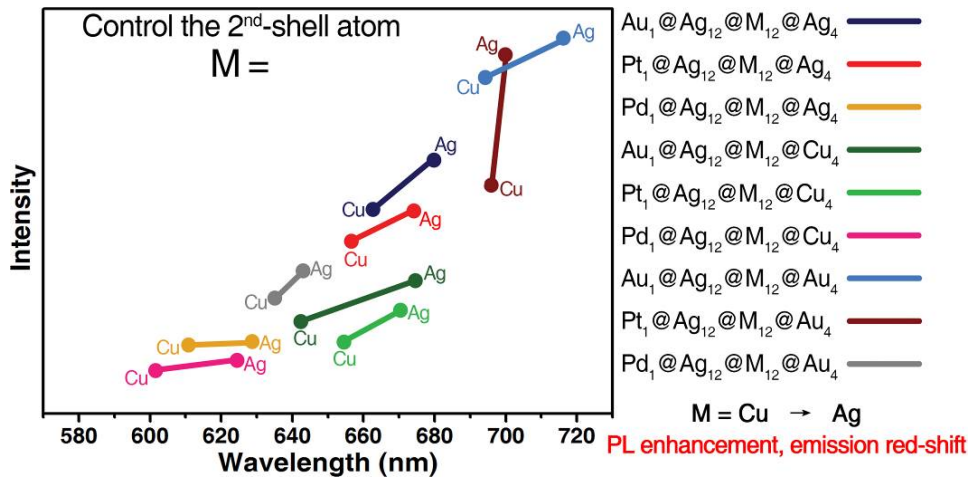

Fig. S46 Correlations between the 2<sup>nd</sup>-shell atom and PL property of the  $M_{29}$  system.

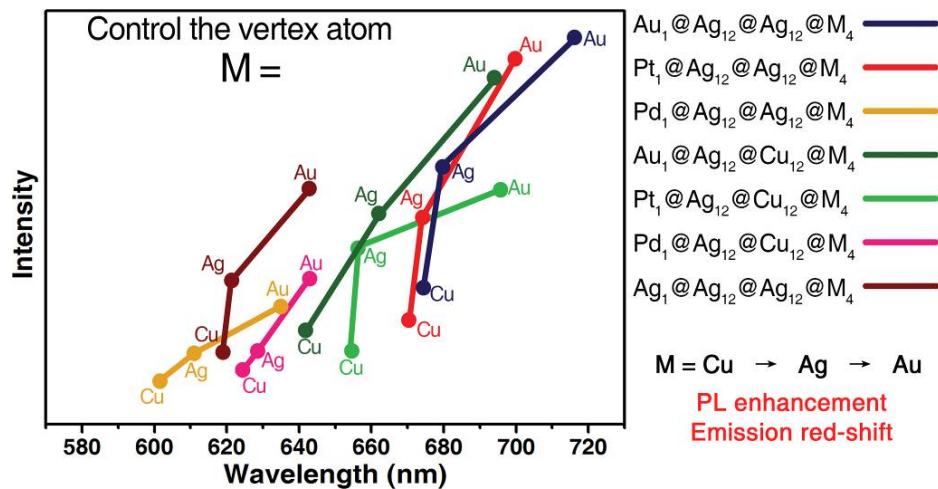

Fig. S47 Correlations between the vertex atom and PL property of the  $M_{29}$  system.



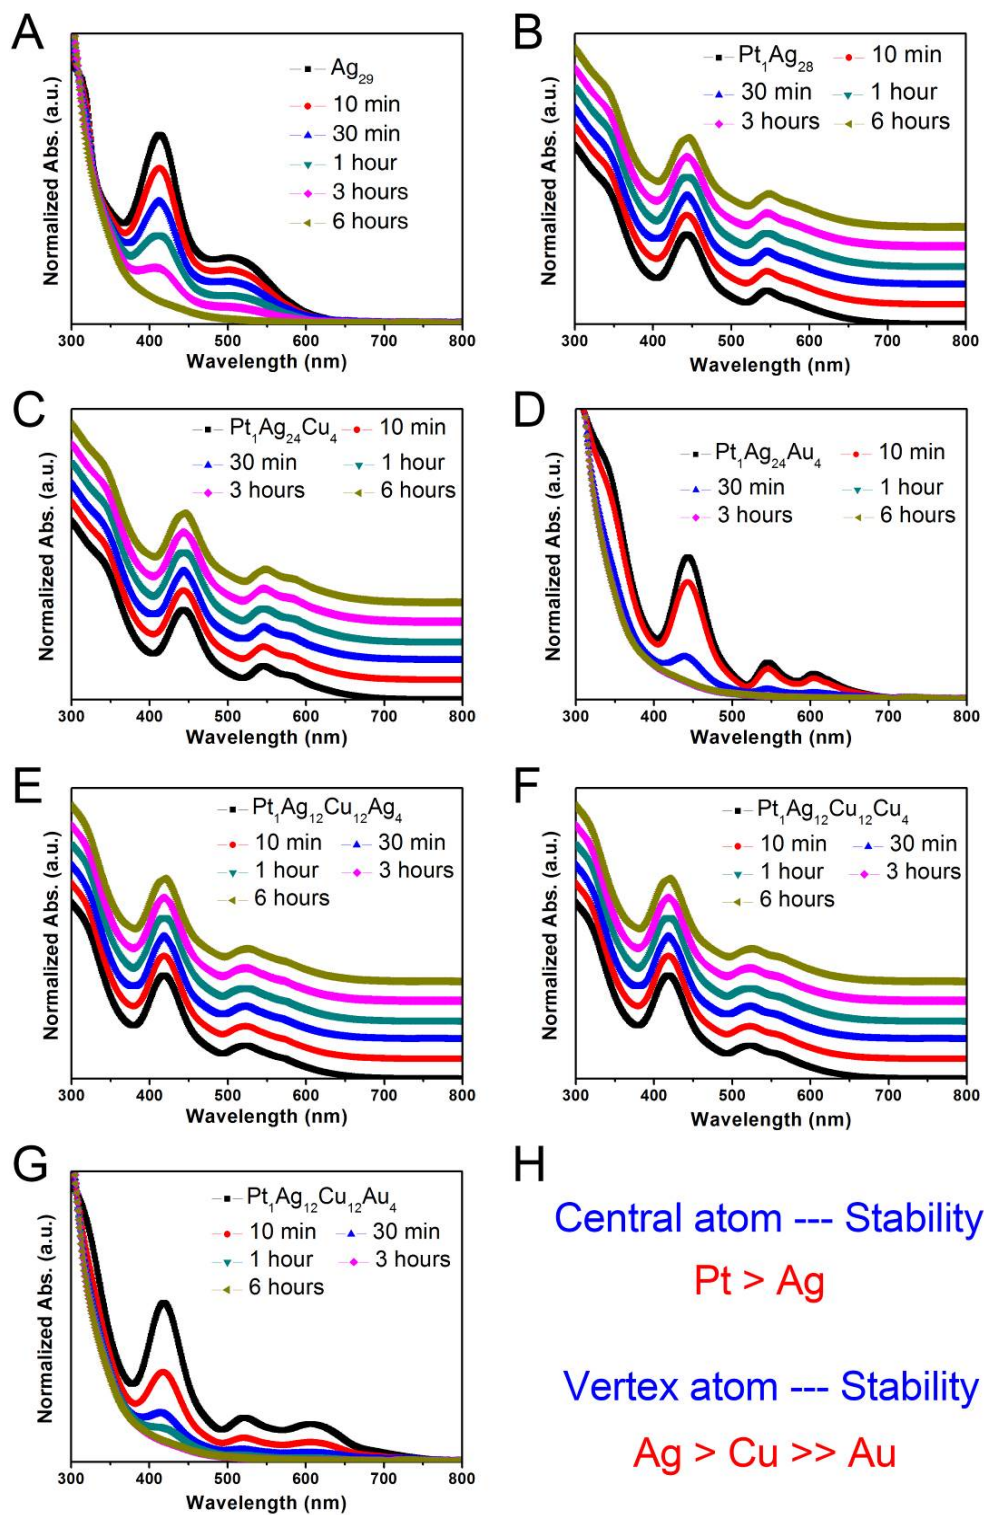

**Fig. S48** Stability test of (A) mono-metallic  $\text{Ag}_{29}$ , (B) bi-metallic  $\text{Pt}_1\text{Ag}_{28}$ , (C) tri-metallic  $\text{Pt}_1\text{Ag}_{24}\text{Cu}_4$ , (D) tri-metallic  $\text{Pt}_1\text{Ag}_{24}\text{Au}_4$ , (E) tri-metallic  $\text{Pt}_1\text{Ag}_{12}\text{Cu}_{16}$ , (F) tri-metallic  $\text{Pt}_1\text{Ag}_{16}\text{Cu}_{12}$ , and (G) tetra-metallic  $\text{Pt}_1\text{Ag}_{12}\text{Cu}_{12}\text{Au}_4$  nanoclusters at room temperature. (H) Correlations between the central atom or the vertex atom and the stability of  $\text{M}_{29}$  nanoclusters.

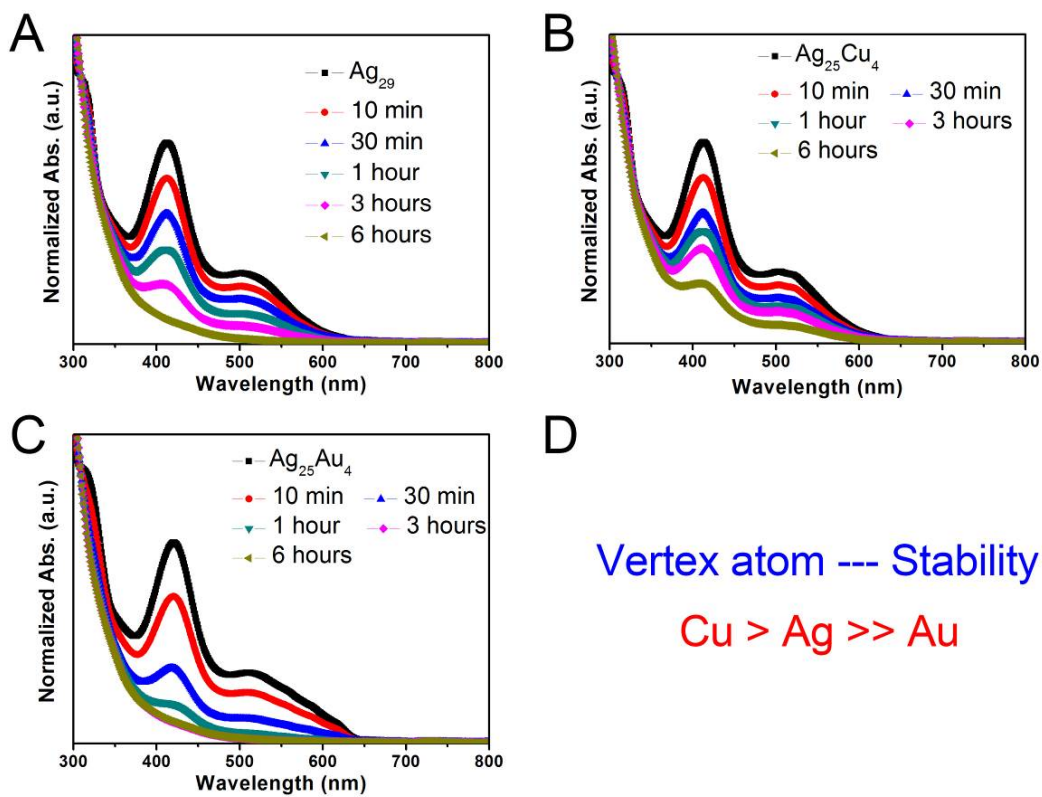

**Fig. S49** Stability test of (A)  $[\text{Ag}_{29}(\text{S-Adm})_{18}(\text{PPh}_3)_4]^{3+}$ , (B)  $[\text{Ag}_{25}\text{Cu}_4(\text{S-Adm})_{18}(\text{PPh}_3)_4]^{3+}$ , and (C)  $[\text{Ag}_{25}\text{Au}_4(\text{S-Adm})_{18}(\text{PPh}_3)_4]^{3+}$  nanoclusters at room temperature. (D) (H) Correlations between the vertex atom and the stability of  $\text{M}_{29}$  nanoclusters.

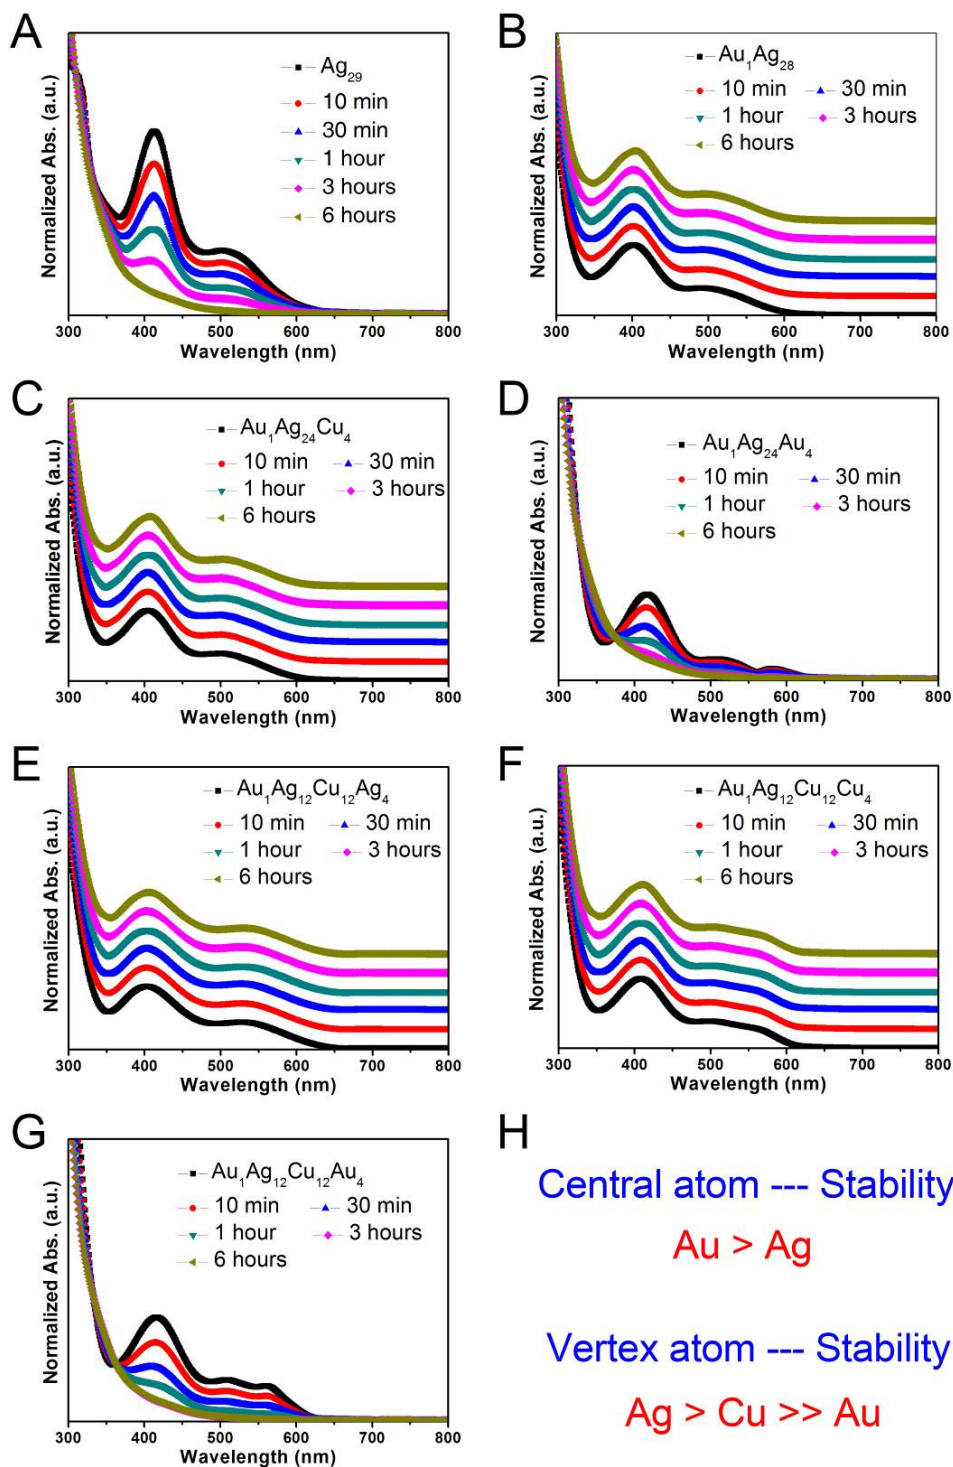

**Fig. S50** Stability of (A)  $[\text{Ag}_{29}(\text{S-Adm})_{18}(\text{PPh}_3)_4]^{3+}$ , (B)  $[\text{Au}_1\text{Ag}_{28}(\text{S-Adm})_{18}(\text{PPh}_3)_4]^{3+}$ , (C)  $[\text{Au}_1\text{Ag}_{24}\text{Cu}_4(\text{S-Adm})_{18}(\text{PPh}_3)_4]^{3+}$ , (D)  $[\text{Au}_5\text{Ag}_{24}(\text{S-Adm})_{18}(\text{PPh}_3)_4]^{3+}$ , (E)  $[\text{Au}_1\text{Ag}_{12}\text{Cu}_{16}(\text{S-Adm})_{18}(\text{PPh}_3)_4]^{3+}$ , (F)  $[\text{Au}_1\text{Ag}_{16}\text{Cu}_{12}(\text{S-Adm})_{18}(\text{PPh}_3)_4]^{3+}$  and (G)  $[\text{Au}_5\text{Ag}_{12}\text{Cu}_{12}(\text{S-Adm})_{18}(\text{PPh}_3)_4]^{3+}$  nanoclusters at room temperature. (H) Correlations between the central atom or the vertex atom and the stability of  $\text{M}_{29}$  nanoclusters.

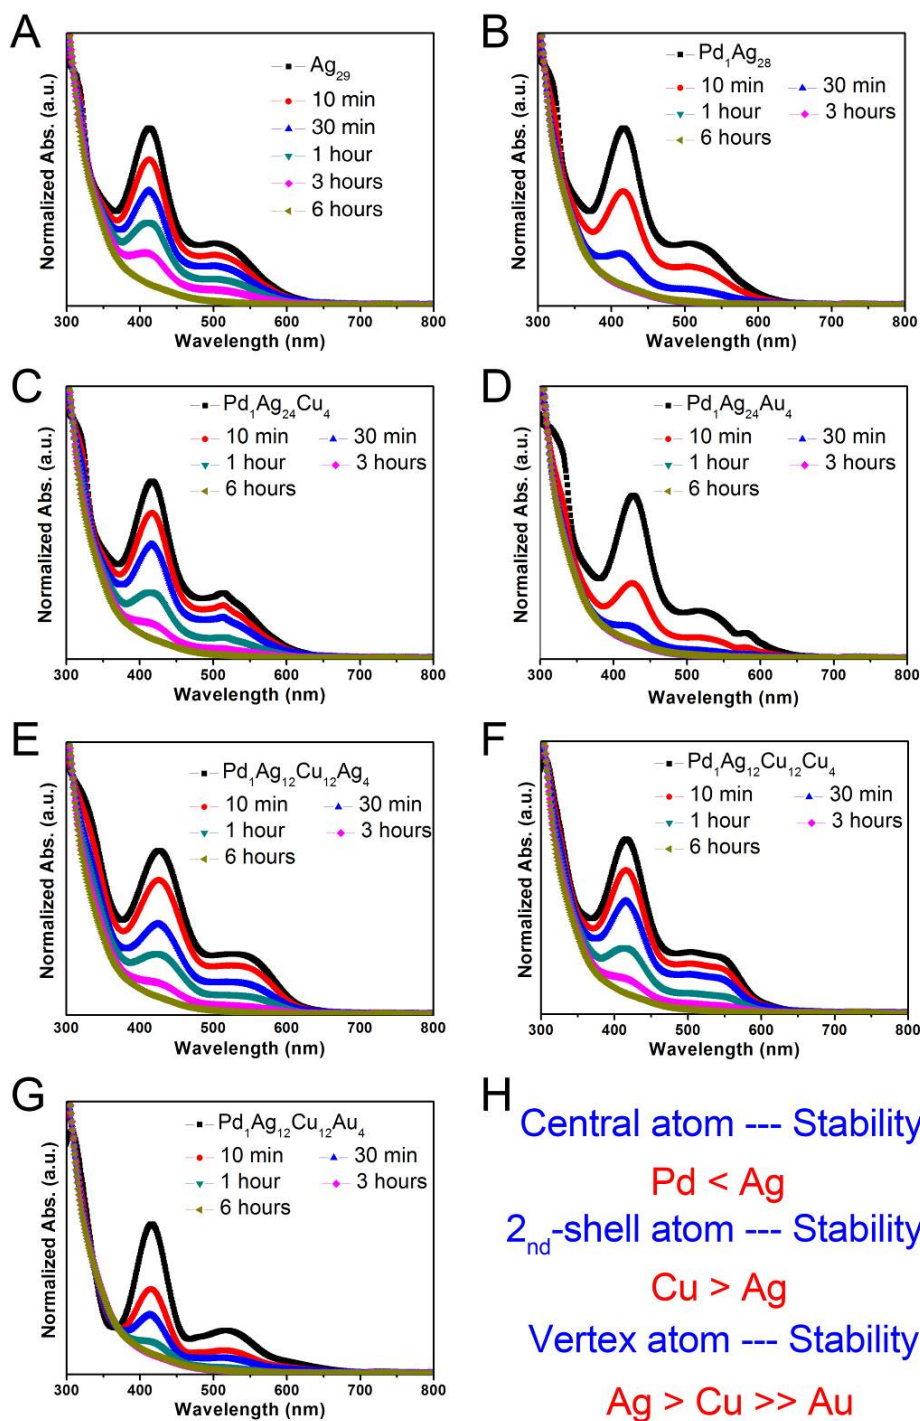

**Fig. S51** Stability of (A)  $[\text{Ag}_{29}(\text{S-Adm})_{18}(\text{PPh}_3)_4]^{3+}$ , (B)  $[\text{Pd}_1\text{Ag}_{28}(\text{S-Adm})_{18}(\text{PPh}_3)_4]^{2+}$ , (C)  $[\text{Pd}_1\text{Ag}_{24}\text{Cu}_4(\text{S-Adm})_{18}(\text{PPh}_3)_4]^{2+}$ , (D)  $[\text{Pd}_1\text{Ag}_{24}\text{Au}_4(\text{S-Adm})_{18}(\text{PPh}_3)_4]^{2+}$ , (E)  $[\text{Pd}_1\text{Ag}_{12}\text{Cu}_{16}(\text{S-Adm})_{18}(\text{PPh}_3)_4]^{2+}$ , (F)  $[\text{Pd}_1\text{Ag}_{16}\text{Cu}_{12}(\text{S-Adm})_{18}(\text{PPh}_3)_4]^{2+}$ , and (G)  $[\text{Pd}_1\text{Ag}_{12}\text{Cu}_{12}\text{Au}_4(\text{S-Adm})_{18}(\text{PPh}_3)_4]^{2+}$  nanoclusters at room temperature. (H) Correlations between the central atom or the vertex atom and the stability of  $\text{M}_{29}$  nanoclusters.

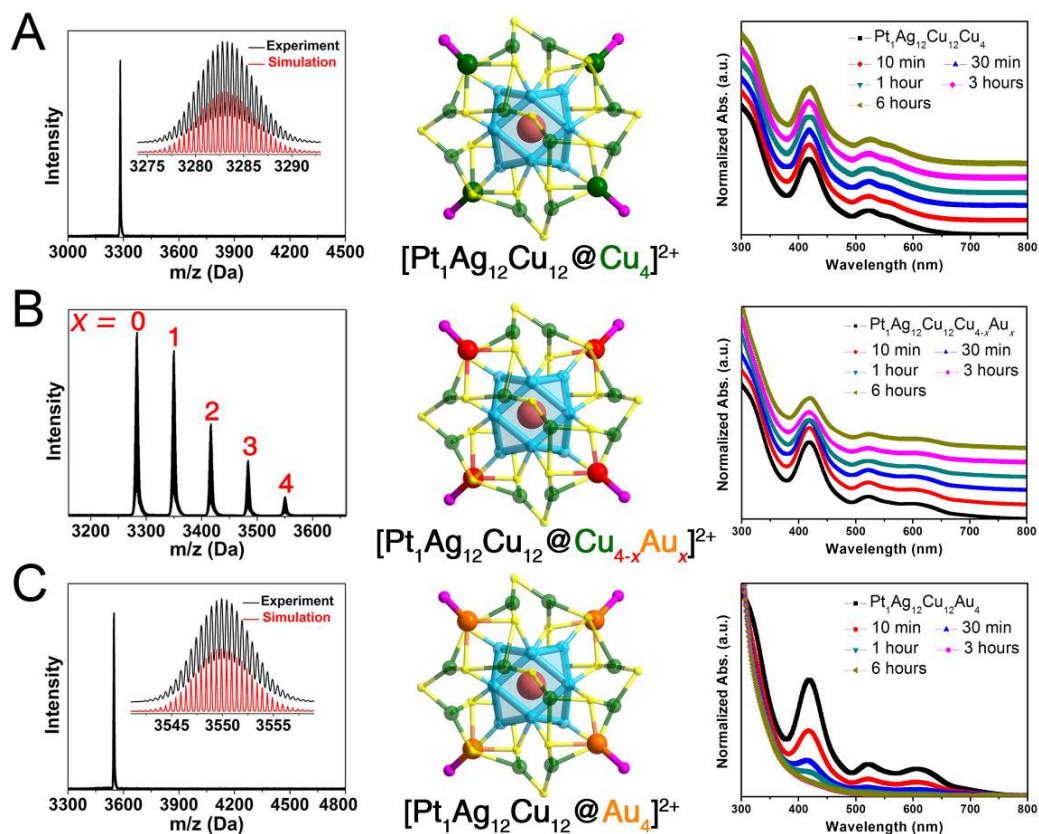

**Fig. S52** Stability of (A)  $[\text{Pt}_1\text{Ag}_{12}\text{Cu}_{12}\text{Cu}_4(\text{S-Adm})_{18}(\text{PPh}_3)_4]^{2+}$ , (B)  $[\text{Pt}_1\text{Ag}_{12}\text{Cu}_{12}\text{Cu}_{4-x}\text{Au}_x(\text{S-Adm})_{18}(\text{PPh}_3)_4]^{2+}$ , and (C)  $[\text{Pt}_1\text{Ag}_{12}\text{Cu}_{12}\text{Au}_4(\text{S-Adm})_{18}(\text{PPh}_3)_4]^{2+}$  at room temperature.

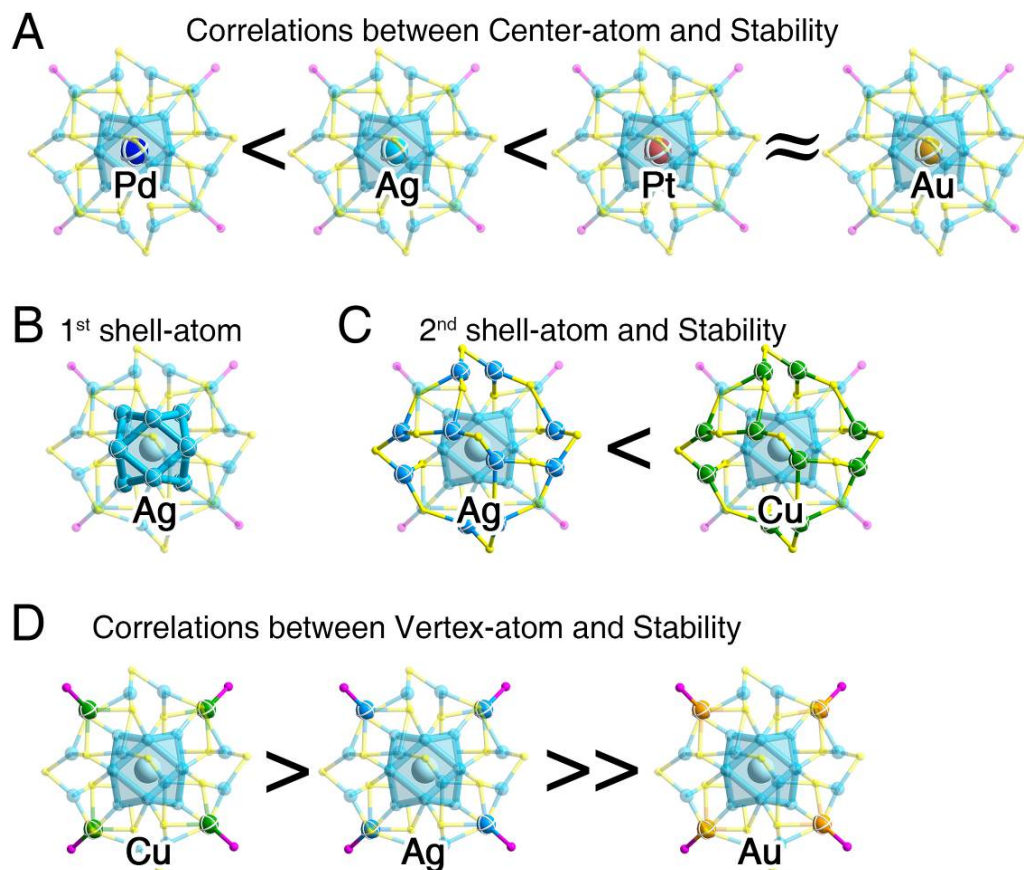

**Fig. S53** Illustrations of the way to enhance the stability of the  $M_{29}$  nanocluster.

**Table S1.** Elemental analysis (EA) results of the M<sub>29</sub> (M = Ag/Au/Pt/Pd/Cu) nanoclusters.

| Sample                                                                                                | Elemental Analysis  |                     |
|-------------------------------------------------------------------------------------------------------|---------------------|---------------------|
|                                                                                                       | Cal.                | Exp.                |
| Ag <sub>29</sub> (SR) <sub>18</sub> (PPh <sub>3</sub> ) <sub>4</sub>                                  | C: 42.11%; H: 4.63% | C: 42.14%; H: 4.66% |
| Ag <sub>25</sub> Cu <sub>4</sub> (SR) <sub>18</sub> (PPh <sub>3</sub> ) <sub>4</sub>                  | C: 43.17%; H: 4.74% | C: 43.22%; H: 4.74% |
| Pt <sub>1</sub> Ag <sub>28</sub> (SR) <sub>18</sub> (PPh <sub>3</sub> ) <sub>4</sub>                  | C: 41.60%; H: 4.57% | C: 41.60%; H: 4.59% |
| Pt <sub>1</sub> Ag <sub>24</sub> Cu <sub>4</sub> (SR) <sub>18</sub> (PPh <sub>3</sub> ) <sub>4</sub>  | C: 42.64%; H: 4.69% | C: 42.69%; H: 4.72% |
| Pt <sub>1</sub> Ag <sub>12</sub> Cu <sub>16</sub> (SR) <sub>18</sub> (PPh <sub>3</sub> ) <sub>4</sub> | C: 46.09%; H: 5.07% | C: 46.13%; H: 5.13% |
| Pt <sub>1</sub> Ag <sub>16</sub> Cu <sub>12</sub> (SR) <sub>18</sub> (PPh <sub>3</sub> ) <sub>4</sub> | C: 44.89%; H: 4.93% | C: 44.81%; H: 4.93% |
| Au <sub>1</sub> Ag <sub>28</sub> (SR) <sub>18</sub> (PPh <sub>3</sub> ) <sub>4</sub>                  | C: 41.59%; H: 4.57% | C: 41.59%; H: 4.44% |
| Au <sub>1</sub> Ag <sub>24</sub> Cu <sub>4</sub> (SR) <sub>18</sub> (PPh <sub>3</sub> ) <sub>4</sub>  | C: 42.63%; H: 4.68% | C: 42.61%; H: 4.64% |
| Au <sub>1</sub> Ag <sub>12</sub> Cu <sub>16</sub> (SR) <sub>18</sub> (PPh <sub>3</sub> ) <sub>4</sub> | C: 46.08%; H: 5.06% | C: 46.08%; H: 5.22% |
| Au <sub>1</sub> Ag <sub>16</sub> Cu <sub>12</sub> (SR) <sub>18</sub> (PPh <sub>3</sub> ) <sub>4</sub> | C: 44.87%; H: 4.93% | C: 44.89%; H: 5.01% |
| Pd <sub>1</sub> Ag <sub>28</sub> (SR) <sub>18</sub> (PPh <sub>3</sub> ) <sub>4</sub>                  | C: 42.11%; H: 4.63% | C: 42.13%; H: 4.66% |
| Pd <sub>1</sub> Ag <sub>24</sub> Cu <sub>4</sub> (SR) <sub>18</sub> (PPh <sub>3</sub> ) <sub>4</sub>  | C: 43.18%; H: 4.74% | C: 43.18%; H: 4.77% |
| Pd <sub>1</sub> Ag <sub>12</sub> Cu <sub>16</sub> (SR) <sub>18</sub> (PPh <sub>3</sub> ) <sub>4</sub> | C: 46.73%; H: 5.13% | C: 46.71%; H: 5.11% |
| Pd <sub>1</sub> Ag <sub>16</sub> Cu <sub>12</sub> (SR) <sub>18</sub> (PPh <sub>3</sub> ) <sub>4</sub> | C: 45.48%; H: 5.07% | C: 45.44%; H: 5.07% |

**Table S2.** Inductively coupled plasma-atomic emission spectrometry (ICP-AES) results of the M<sub>29</sub> (M = Ag/Au/Pt/Pd/Cu) nanoclusters.

| Sample                                                                                                | ICP-AES analysis                     |                                       |
|-------------------------------------------------------------------------------------------------------|--------------------------------------|---------------------------------------|
|                                                                                                       | Cal.                                 | Exp.                                  |
| Ag <sub>25</sub> Cu <sub>4</sub> (SR) <sub>18</sub> (PPh <sub>3</sub> ) <sub>4</sub>                  | Ag: 86.21%; Cu: 13.79%               | Ag: 85.89%; Cu: 14.11%                |
| Pt <sub>1</sub> Ag <sub>28</sub> (SR) <sub>18</sub> (PPh <sub>3</sub> ) <sub>4</sub>                  | Pt: 3.45%; Ag: 96.55%                | Pt: 3.27%; Ag: 96.73%                 |
| Pt <sub>1</sub> Ag <sub>24</sub> Cu <sub>4</sub> (SR) <sub>18</sub> (PPh <sub>3</sub> ) <sub>4</sub>  | Pt: 3.45%; Ag: 82.76%;<br>Cu: 13.79% | Pt: 3.11%; Ag: 83.45%;<br>Cu: 13.44%  |
| Pt <sub>1</sub> Ag <sub>12</sub> Cu <sub>16</sub> (SR) <sub>18</sub> (PPh <sub>3</sub> ) <sub>4</sub> | Pt: 3.45%; Ag: 41.38%;<br>Cu: 55.17% | Pt: 3.63%; Ag: 40.51%;<br>Cu: 55.86%  |
| Pt <sub>1</sub> Ag <sub>16</sub> Cu <sub>12</sub> (SR) <sub>18</sub> (PPh <sub>3</sub> ) <sub>4</sub> | Pt: 3.45%; Ag: 55.17%;<br>Cu: 41.39% | Pt: 3.41%; Ag: 56.02 %;<br>Cu: 40.57% |
| Au <sub>1</sub> Ag <sub>28</sub> (SR) <sub>18</sub> (PPh <sub>3</sub> ) <sub>4</sub>                  | Au: 3.45%; Ag: 96.55%                | Au: 3.51%; Ag: 96.49%                 |
| Au <sub>1</sub> Ag <sub>24</sub> Cu <sub>4</sub> (SR) <sub>18</sub> (PPh <sub>3</sub> ) <sub>4</sub>  | Au: 3.45%; Ag: 82.76%;<br>Cu: 13.79% | Au: 3.62%; Ag: 82.01%;<br>Cu: 14.37%  |
| Au <sub>1</sub> Ag <sub>12</sub> Cu <sub>16</sub> (SR) <sub>18</sub> (PPh <sub>3</sub> ) <sub>4</sub> | Au: 3.45%; Ag: 41.38%;<br>Cu: 55.17% | Au: 3.28%; Ag: 40.94%;<br>Cu: 55.78%  |
| Au <sub>1</sub> Ag <sub>16</sub> Cu <sub>12</sub> (SR) <sub>18</sub> (PPh <sub>3</sub> ) <sub>4</sub> | Au: 3.45%; Ag: 55.17%;<br>Cu: 41.39% | Au: 3.49%; Ag: 55.82%;<br>Cu: 40.69%  |
| Pd <sub>1</sub> Ag <sub>28</sub> (SR) <sub>18</sub> (PPh <sub>3</sub> ) <sub>4</sub>                  | Pd: 3.45%; Ag: 96.55%                | Pd: 3.29%; Ag: 96.71%                 |
| Pd <sub>1</sub> Ag <sub>24</sub> Cu <sub>4</sub> (SR) <sub>18</sub> (PPh <sub>3</sub> ) <sub>4</sub>  | Pd: 3.45%; Ag: 82.76%;<br>Cu: 13.79% | Pd: 3.22%; Ag: 83.42%;<br>Cu: 13.36%  |
| Pd <sub>1</sub> Ag <sub>12</sub> Cu <sub>16</sub> (SR) <sub>18</sub> (PPh <sub>3</sub> ) <sub>4</sub> | Pd: 3.45%; Ag: 41.38%;<br>Cu: 55.17% | Pd: 3.37%; Ag: 41.70%;<br>Cu: 54.93%  |
| Pd <sub>1</sub> Ag <sub>16</sub> Cu <sub>12</sub> (SR) <sub>18</sub> (PPh <sub>3</sub> ) <sub>4</sub> | Pd: 3.45%; Ag: 55.17%;<br>Cu: 41.39% | Pd: 3.64%; Ag: 55.92%;<br>Cu: 40.44%  |



**Table S3.** Crystal data and structure refinement for Au<sub>1</sub>Ag<sub>28</sub>(S-Adm)<sub>18</sub>(PPh<sub>3</sub>)<sub>4</sub> nanocluster (CCDC: 1872544).

|                                    |                                                                                                                         |
|------------------------------------|-------------------------------------------------------------------------------------------------------------------------|
| Identification code                | Au <sub>1</sub> Ag <sub>28</sub> (S-Adm) <sub>18</sub> (PPh <sub>3</sub> ) <sub>4</sub>                                 |
| Empirical formula                  | C <sub>255</sub> H <sub>311</sub> Ag <sub>28</sub> Au <sub>4</sub> S <sub>182</sub> (C <sub>24</sub> H <sub>18</sub> B) |
| Formula weight                     | 8442.28                                                                                                                 |
| Temperature/K                      | 180                                                                                                                     |
| Crystal system                     | monoclinic                                                                                                              |
| Space group                        | I 1 2/a 1                                                                                                               |
| a/Å                                | 37.149(3)                                                                                                               |
| b/Å                                | 25.0838(18)                                                                                                             |
| c/Å                                | 37.150(3)                                                                                                               |
| α°                                 | 90                                                                                                                      |
| β°                                 | 92.318(7)                                                                                                               |
| γ°                                 | 90                                                                                                                      |
| Volume/Å <sup>3</sup>              | 34589(5)                                                                                                                |
| Z                                  | 4                                                                                                                       |
| ρ <sub>calc</sub> /cm <sup>3</sup> | 1.621                                                                                                                   |
| μ/mm <sup>-1</sup>                 | 2.231                                                                                                                   |
| F(000)                             | 16696                                                                                                                   |
| Crystal size/mm <sup>3</sup>       | 0.1 × 0.1 × 0.1                                                                                                         |
| Radiation                          | MoKα (λ = 0.71073)                                                                                                      |
| Index ranges                       | -44 ≤ h ≤ 44, -29 ≤ k ≤ 29, -44 ≤ l ≤ 44                                                                                |
| Final R indexes [I >= 2σ (I)]      | R <sub>1</sub> = 0.1355, wR <sub>2</sub> = 0.3047                                                                       |
| Final R indexes [all data]         | R <sub>1</sub> = 0.2300, wR <sub>2</sub> = 0.3492                                                                       |

**Table S4.** Crystal data and structure refinement for Pt<sub>1</sub>Ag<sub>12</sub>Cu<sub>16</sub>(S-Adm)<sub>18</sub>(PPh<sub>3</sub>)<sub>4</sub> nanocluster (CCDC: 1872534).

|                                    |                                                                                                                     |
|------------------------------------|---------------------------------------------------------------------------------------------------------------------|
| Identification code                | Pt <sub>1</sub> Ag <sub>12</sub> Cu <sub>16</sub> (S-Adm) <sub>18</sub> (PPh <sub>3</sub> ) <sub>4</sub>            |
| Empirical formula                  | C <sub>252</sub> H <sub>330</sub> Ag <sub>12</sub> Cu <sub>16</sub> P <sub>4</sub> Pt <sub>18</sub> S <sub>18</sub> |
| Formula weight                     | 6566.27                                                                                                             |
| Temperature/K                      | 153                                                                                                                 |
| Crystal system                     | triclinic                                                                                                           |
| Space group                        | P 1                                                                                                                 |
| a/Å                                | 24.955(2)                                                                                                           |
| b/Å                                | 28.968(3)                                                                                                           |
| c/Å                                | 29.0160(16)                                                                                                         |
| α°                                 | 79.750(4)                                                                                                           |
| β°                                 | 65.563(3)                                                                                                           |
| γ°                                 | 64.557(3)                                                                                                           |
| Volume/Å <sup>3</sup>              | 17245(3)                                                                                                            |
| Z                                  | 1                                                                                                                   |
| ρ <sub>calc</sub> /cm <sup>3</sup> | 0.632                                                                                                               |
| μ/mm <sup>-1</sup>                 | 1.097                                                                                                               |
| F(000)                             | 3296                                                                                                                |
| Crystal size/mm <sup>3</sup>       | 0.220 × 0.200 × 0.180                                                                                               |
| Radiation                          | MoKα (λ = 0.71073)                                                                                                  |
| Index ranges                       | -32 ≤ h ≤ 32, -37 ≤ k ≤ 37, -37 ≤ l ≤ 37                                                                            |
| Final R indexes [I >= 2σ (I)]      | R <sub>1</sub> = 0.0501, wR <sub>2</sub> = 0.1042                                                                   |
| Final R indexes [all data]         | R <sub>1</sub> = 0.0512, wR <sub>2</sub> = 0.1044                                                                   |
